# Supplementary material for: Clustering and Regression-Based Analysis of PM2.5 Sensitivity to Meteorology in Cincinnati, Ohio
Source: MDPI journal article supplement (doi:10.3390/atmos13040545), 2022-03-29
Supplement: s1 [file s1]

# Supplementary Materials: Clustering and Regression-Based Analysis of PM<sub>2.5</sub> Sensitivity to Meteorology in Cincinnati, Ohio

Madhumitaa Roy <sup>1</sup>, Cole Brokamp <sup>2,3</sup> and Sivaraman Balachandran <sup>1,\*</sup>

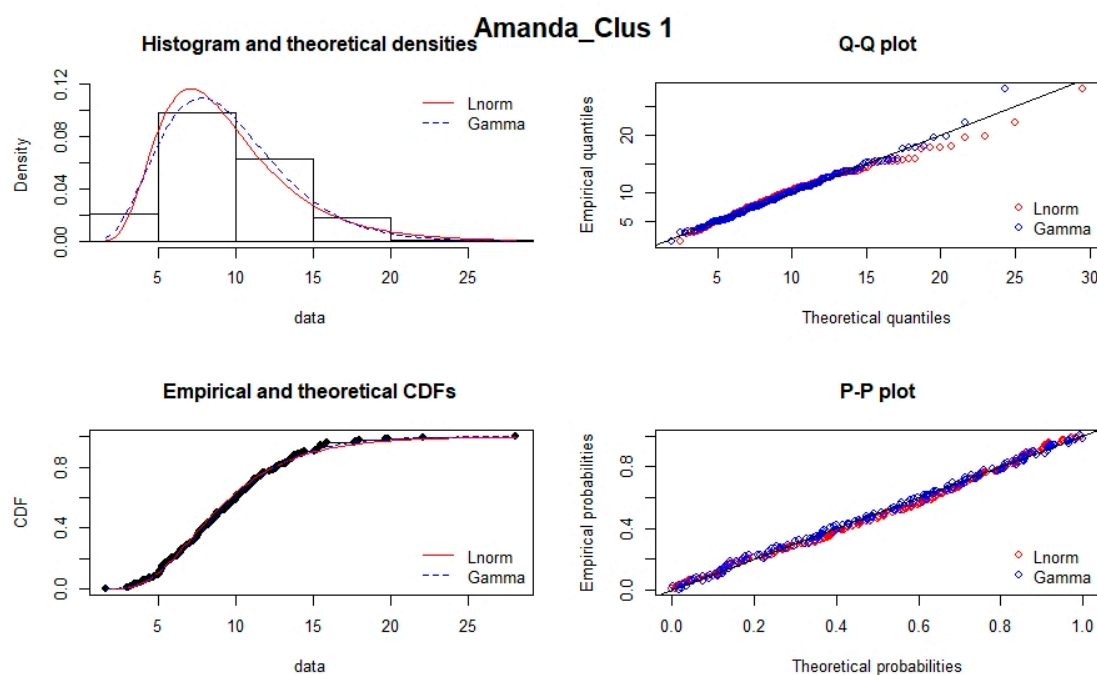

**Figure S1.** Comparison of Gamma and Lognormal distribution at Amanda\_Clus1.

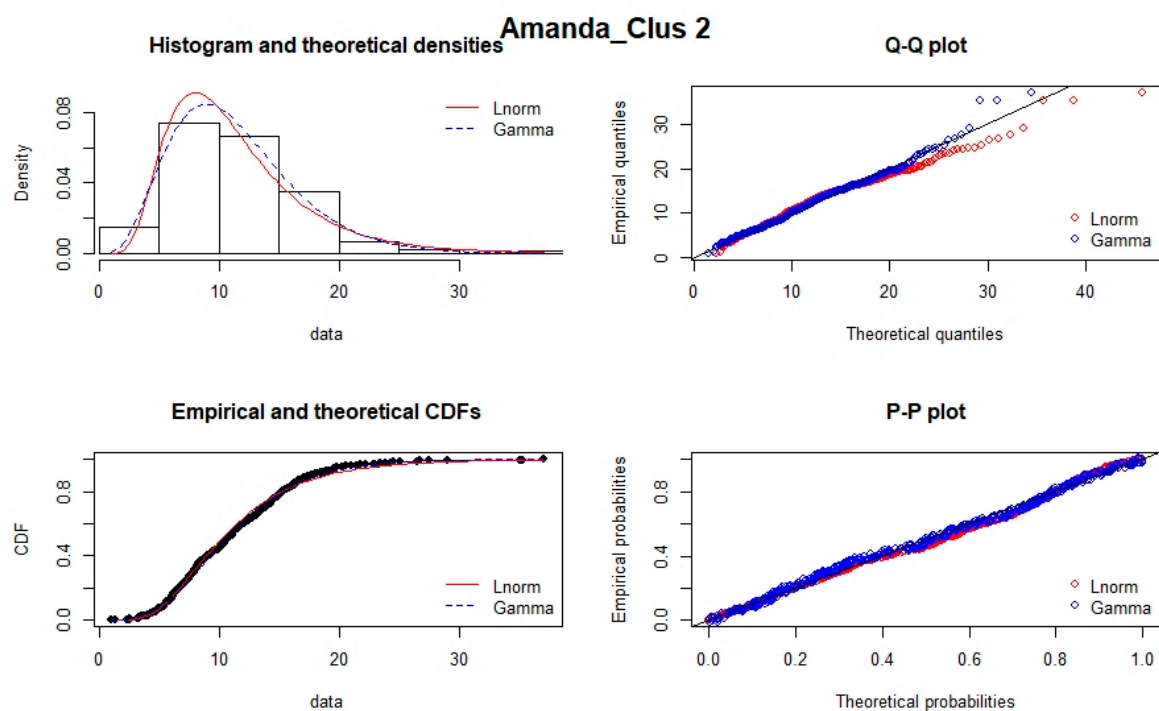

Figure S2. Comparison of Gamma and Lognormal distribution at Amanda\_Clus2.

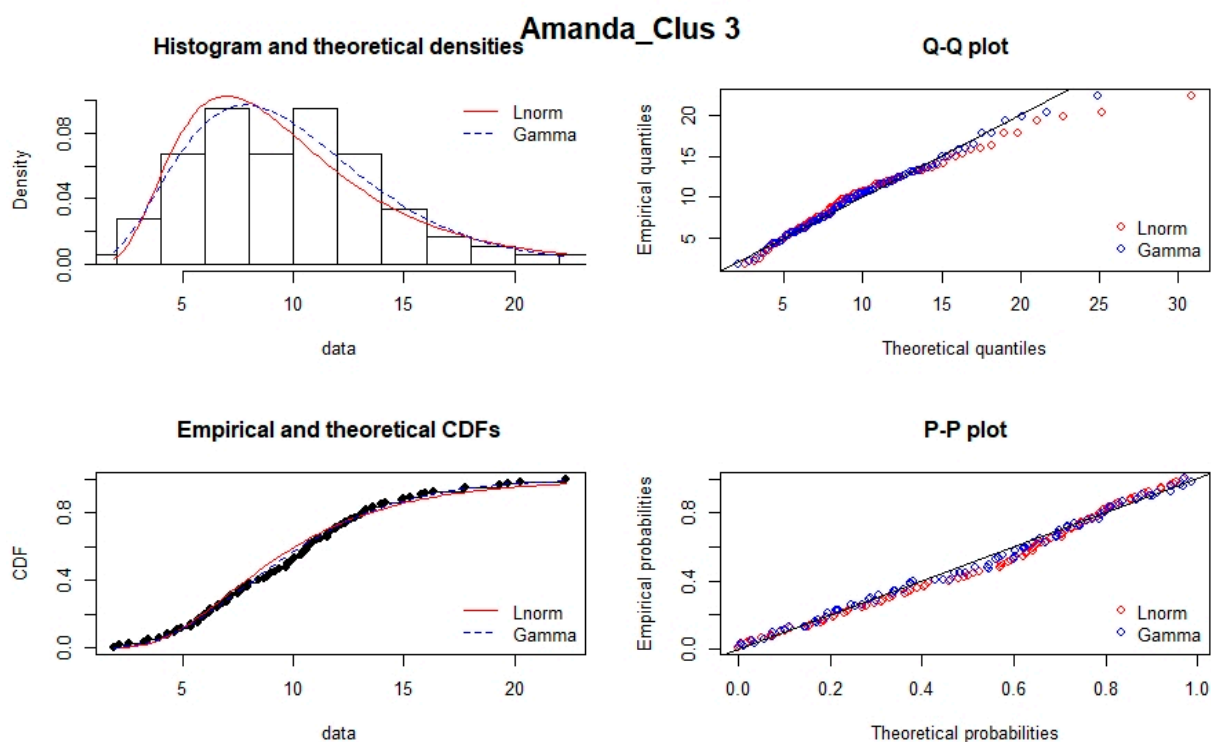

Figure S3. Comparison of Gamma and Lognormal distribution at Amanda\_Clus3.

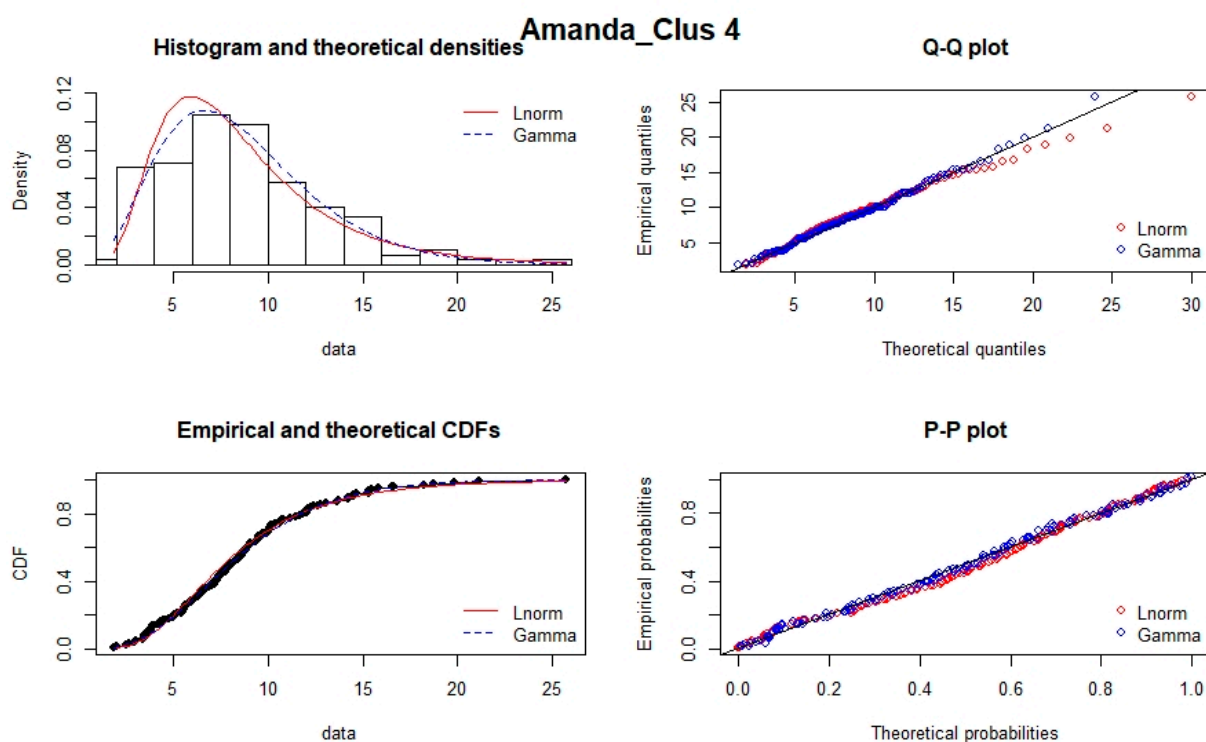

Figure S4. Comparison of Gamma and Lognormal distribution at Amanda\_Clus4.

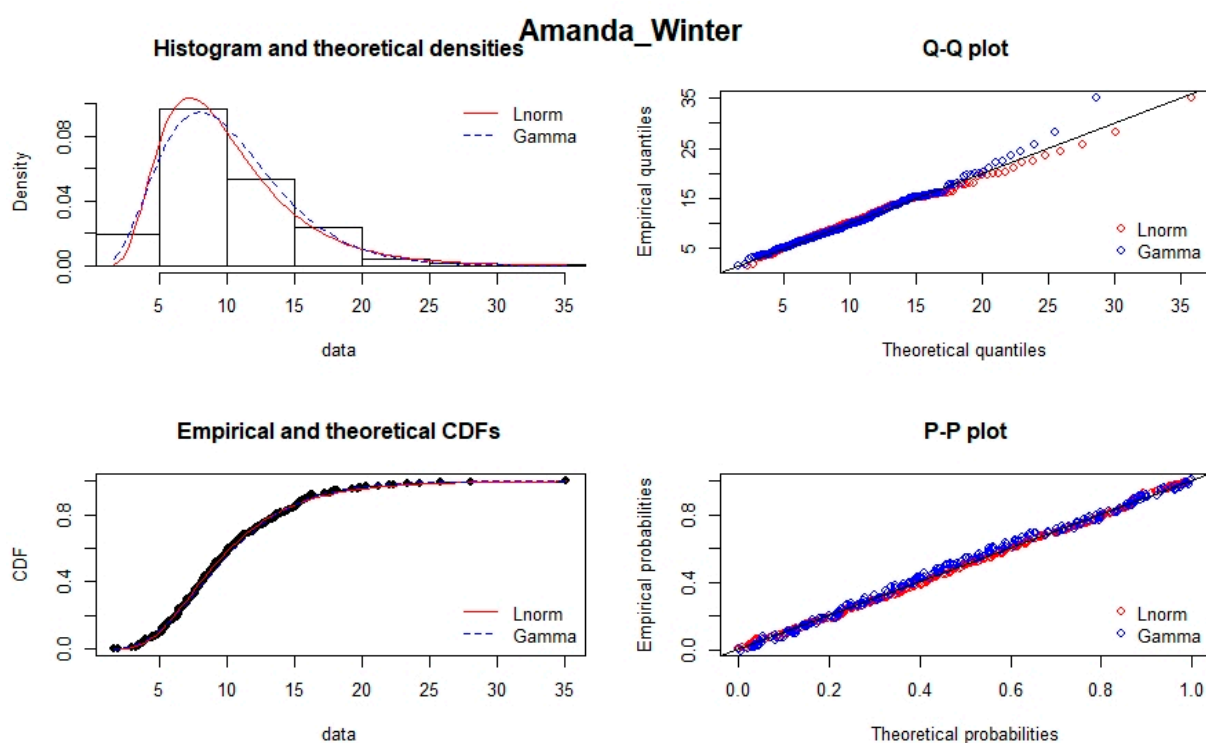

Figure S5. Comparison of Gamma and Lognormal distribution at Amanda\_Winter.

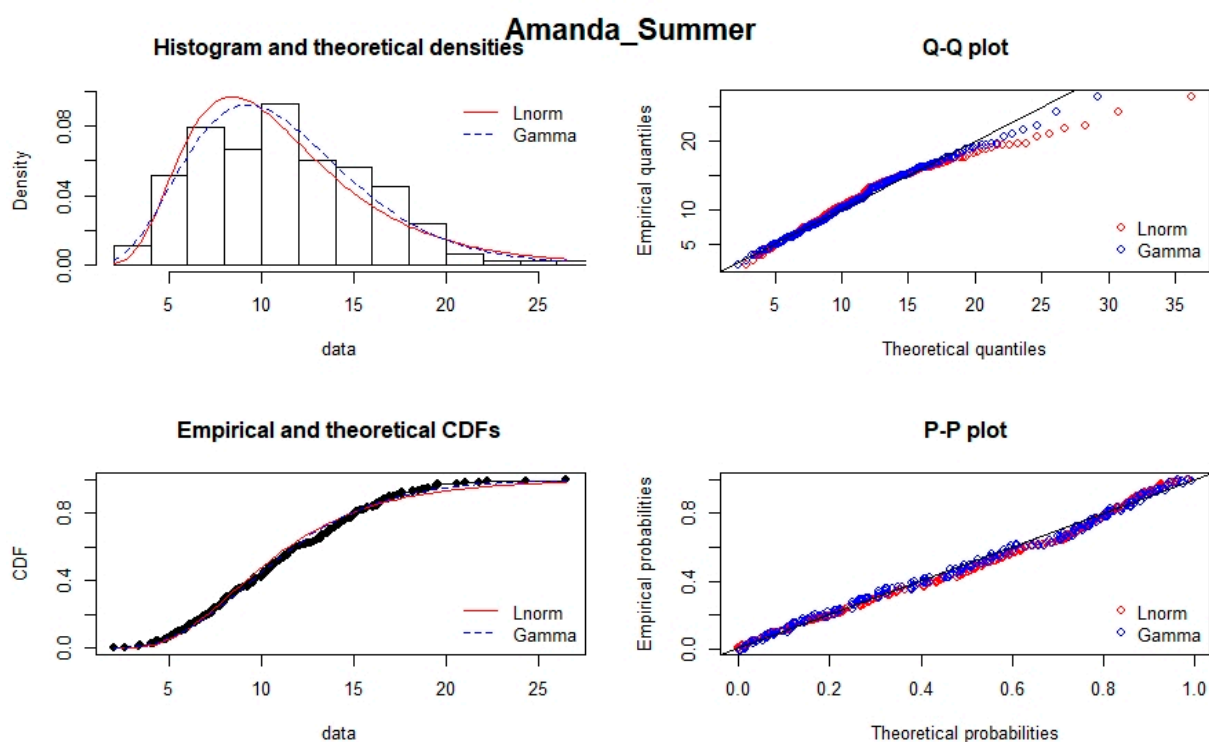

Figure S6 Comparison of Gamma and Lognormal distribution at Amanda\_Summer.

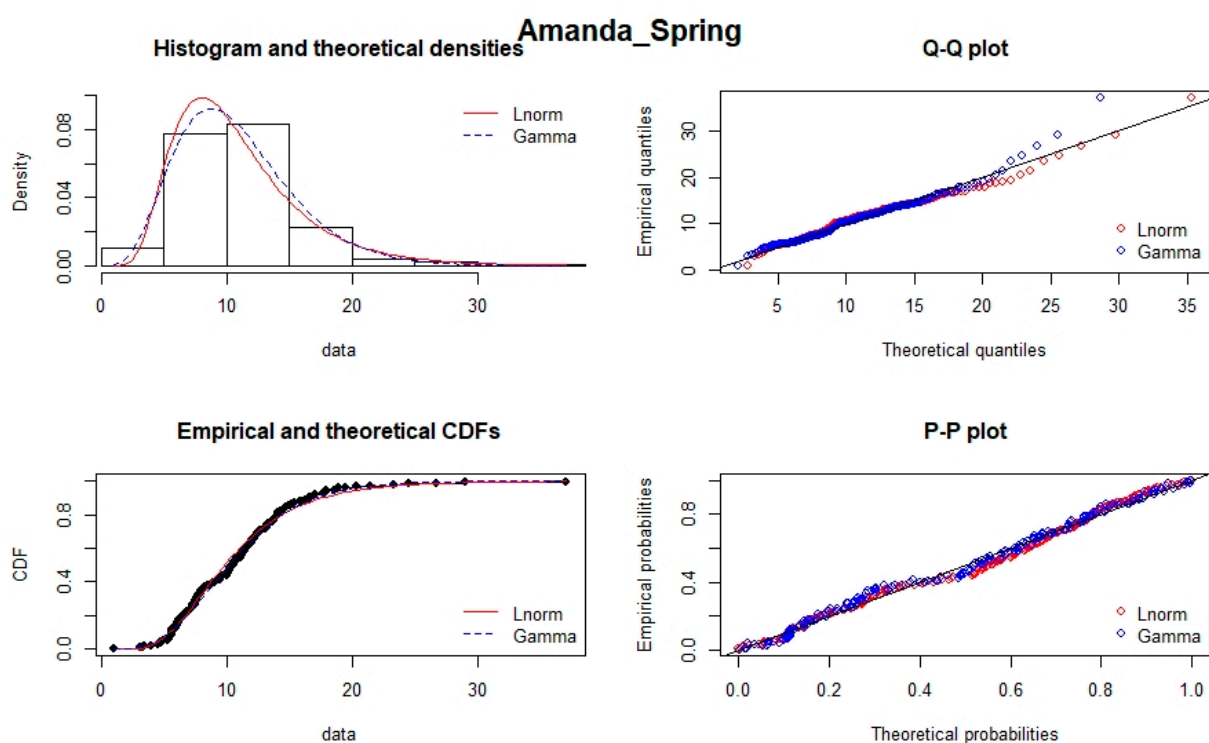

Figure S7. Comparison of Gamma and Lognormal distribution at Amanda\_Spring.

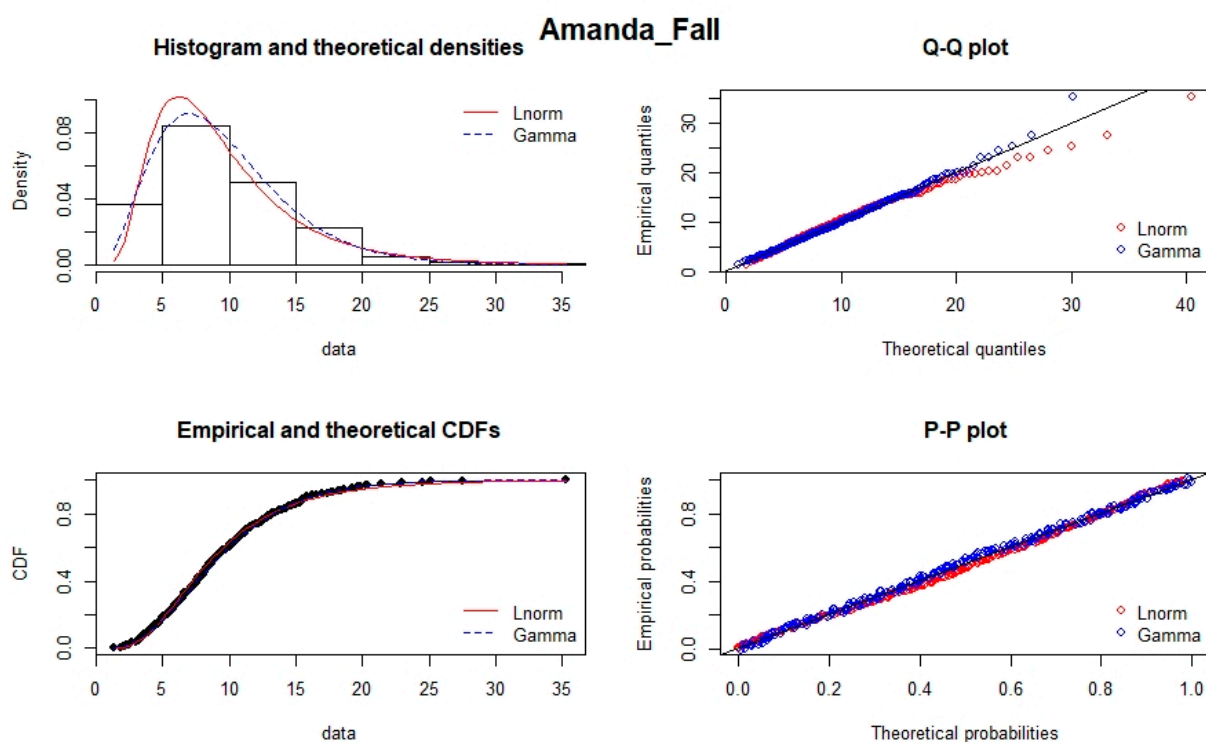

Figure S8. Comparison of Gamma and Lognormal distribution at Amanda\_Fall.

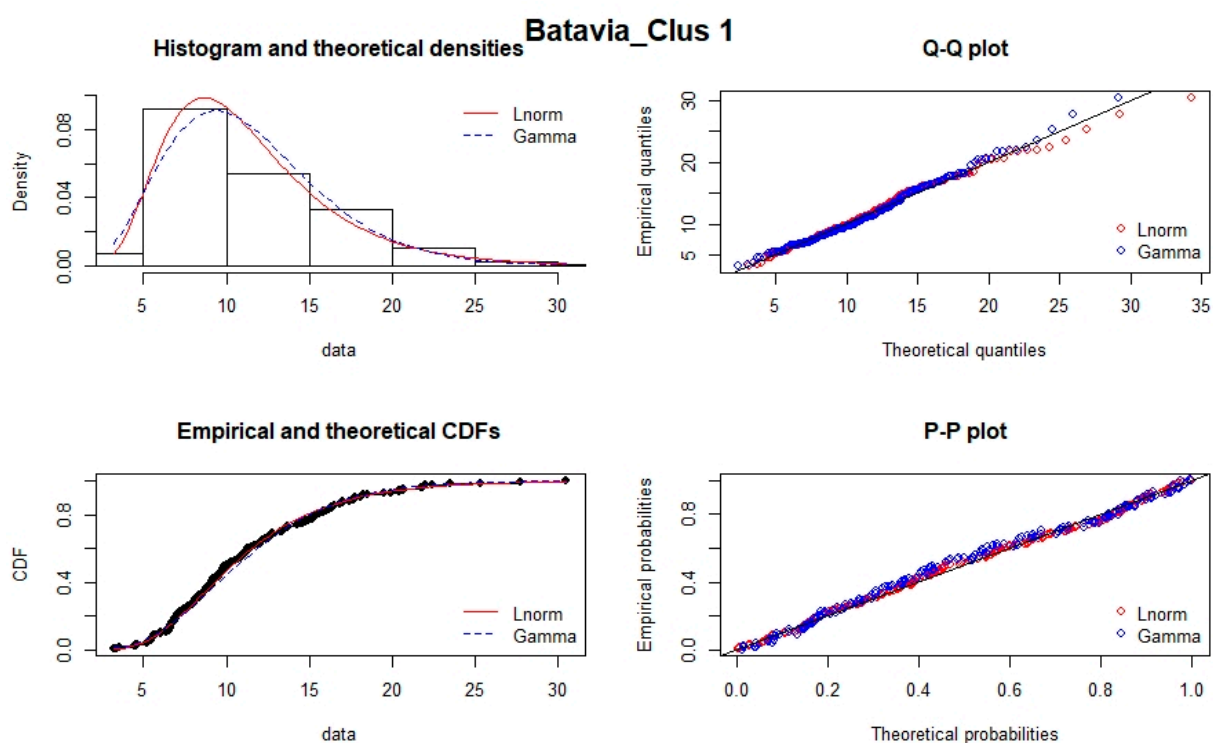

Figure S9. Comparison of Gamma and Lognormal distribution at Batavia\_Clus1.

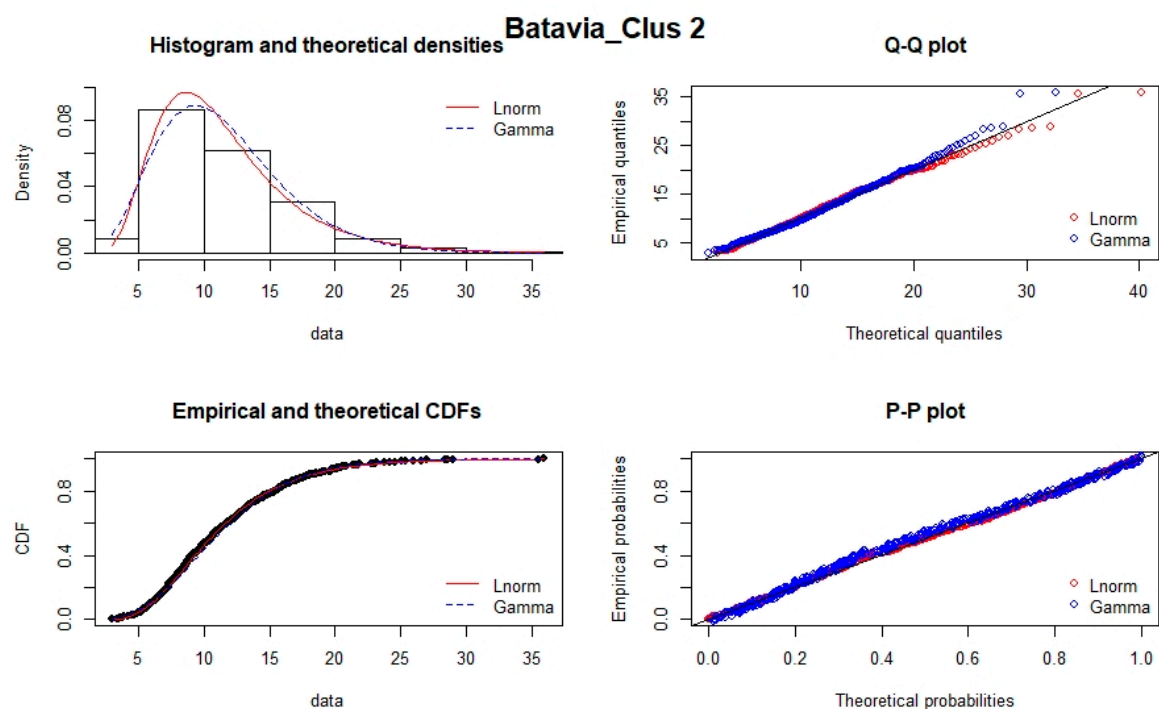

Figure S10. Comparison of Gamma and Lognormal distribution at Batavia\_Clus2.

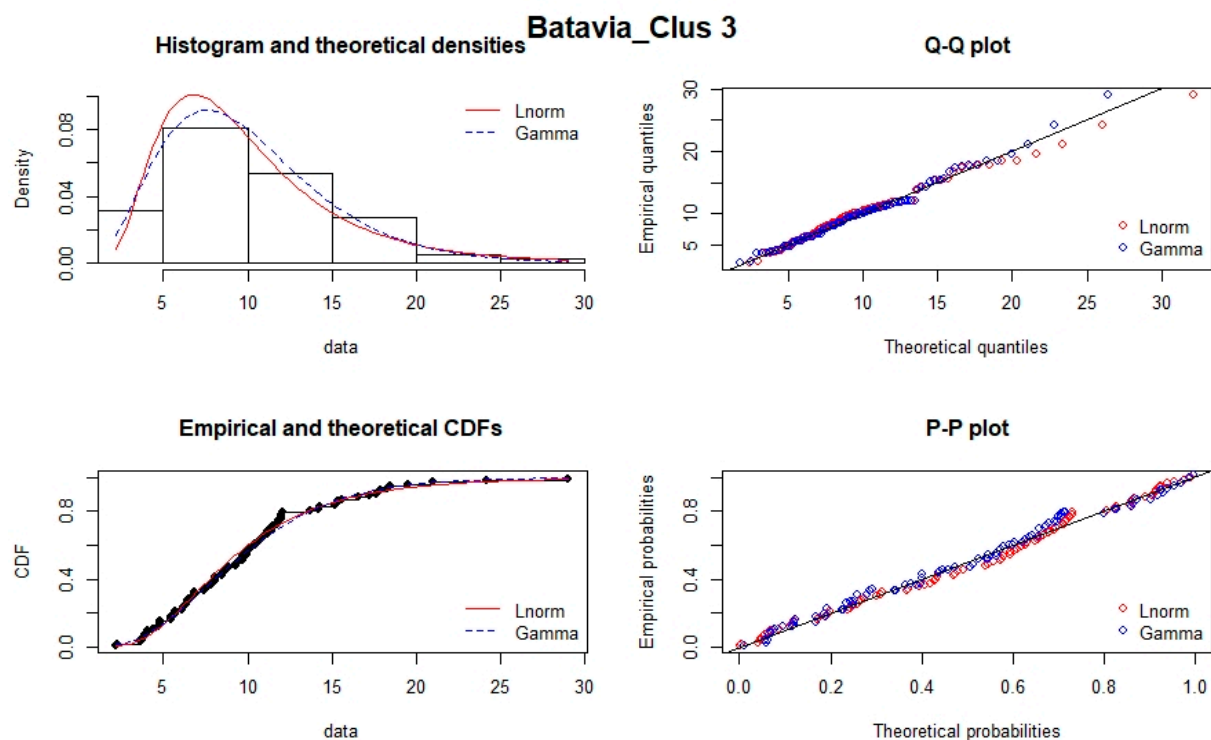

Figure S11. Comparison of Gamma and Lognormal distribution at Batavia\_Clus3.

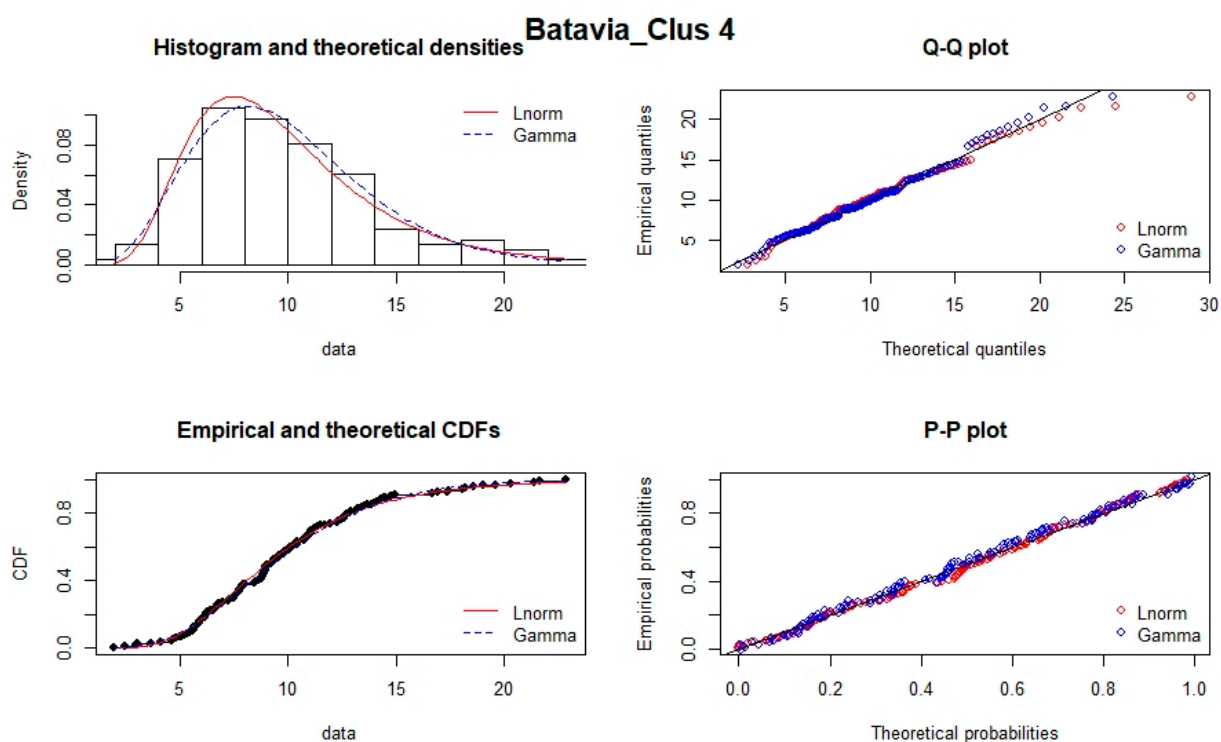

Figure S12. Comparison of Gamma and Lognormal distribution at Batavia\_Clus4.

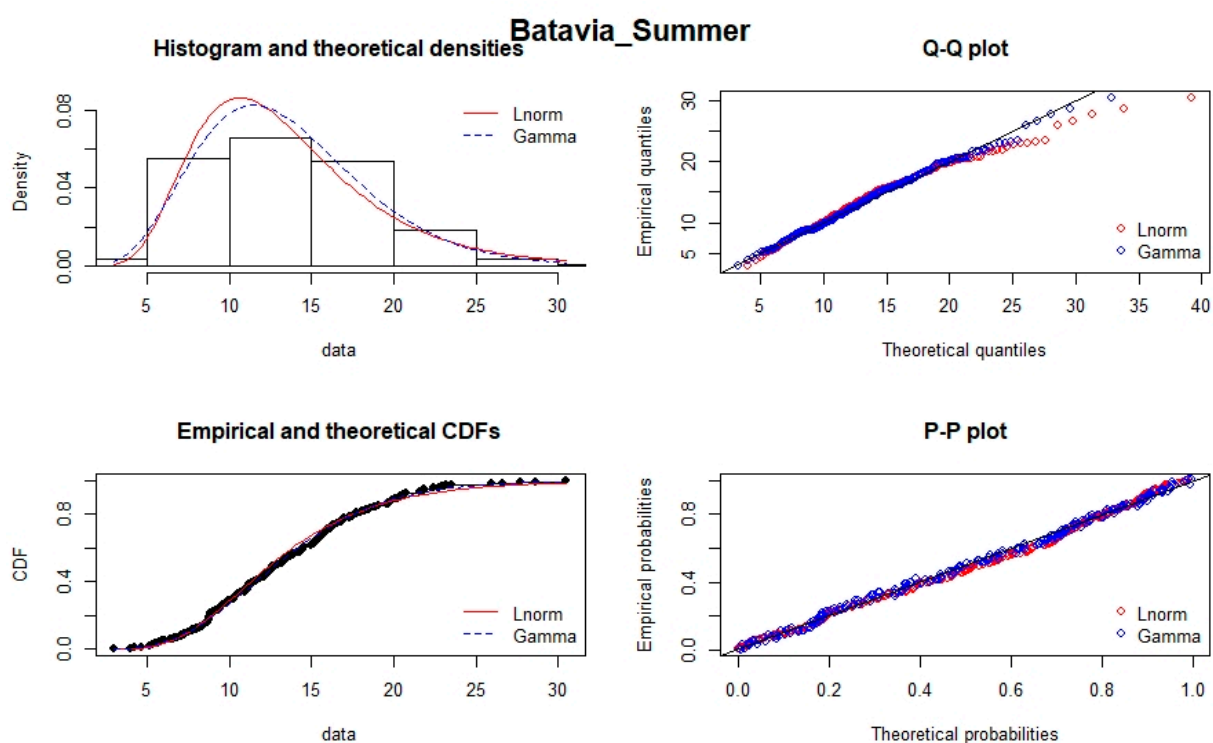

Figure S13. Comparison of Gamma and Lognormal distribution at Batavia\_Summer.



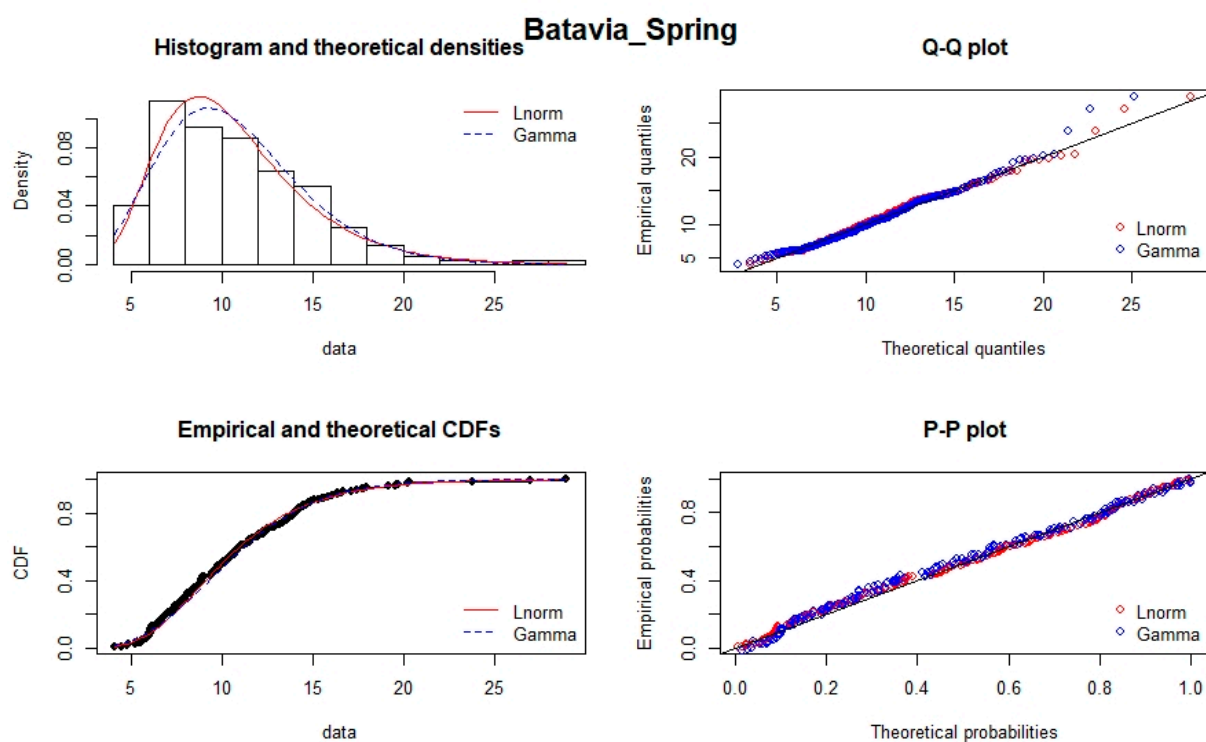

Figure S14. Comparison of Gamma and Lognormal distribution at Batavia\_Spring.

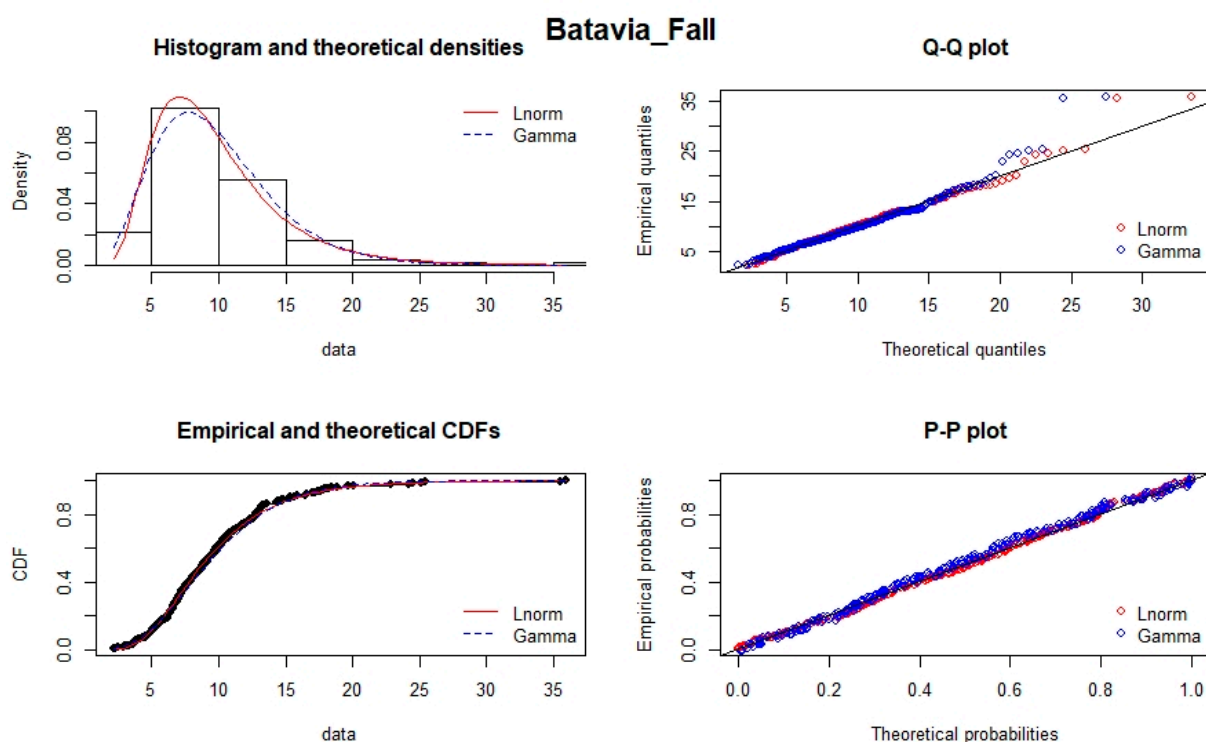

Figure S15. Comparison of Gamma and Lognormal distribution at Batavia\_Fall.



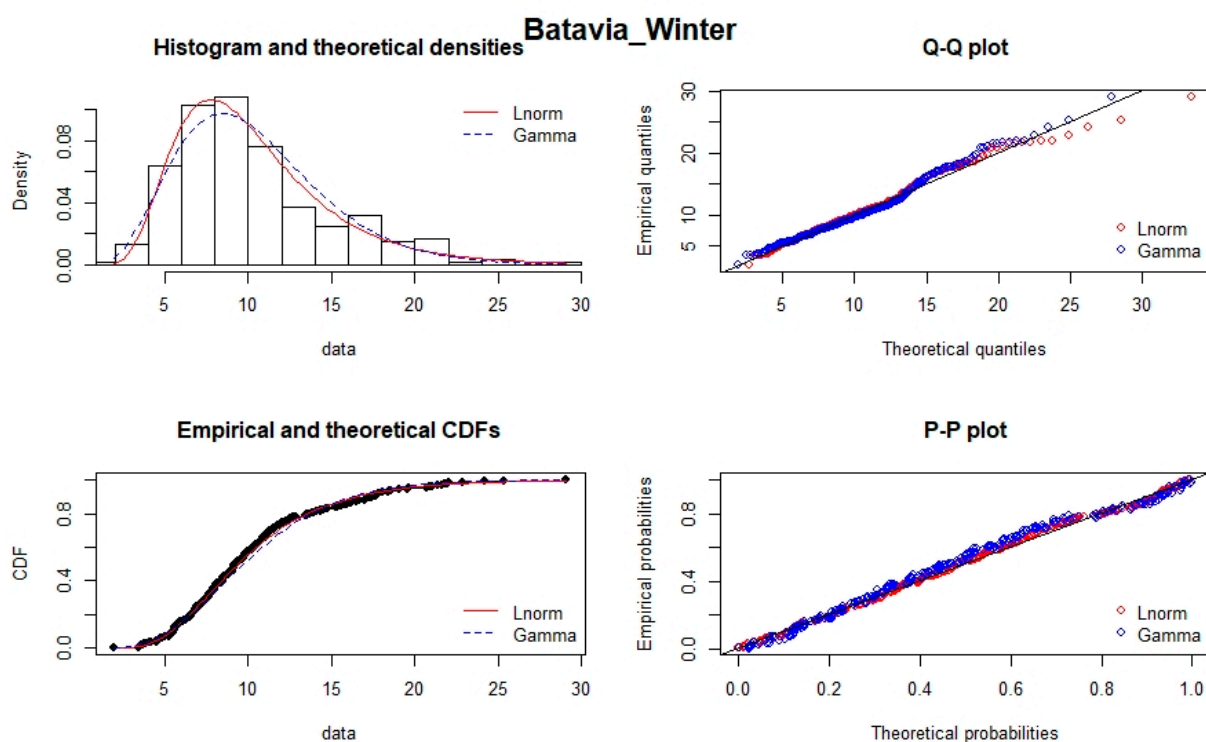

Figure S16. Comparison of Gamma and Lognormal distribution at Batavia\_Winter.

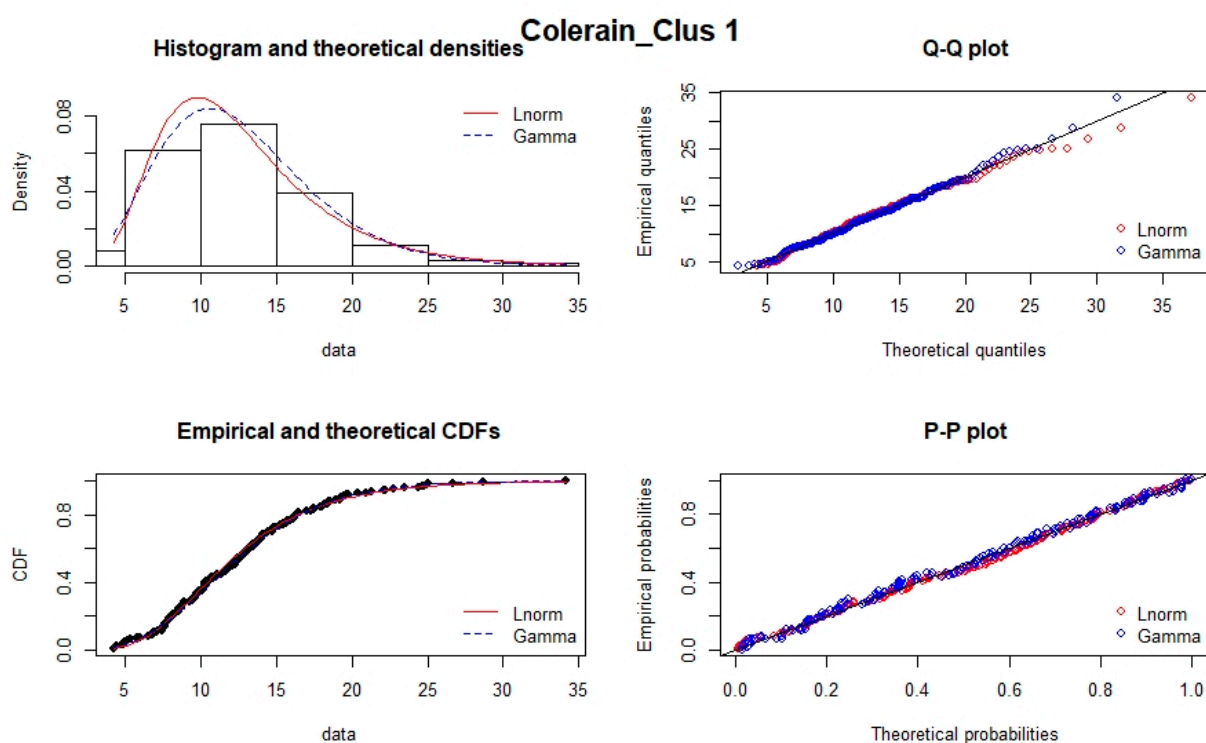

Figure S17. Comparison of Gamma and Lognormal distribution at Colerain\_Clus1.

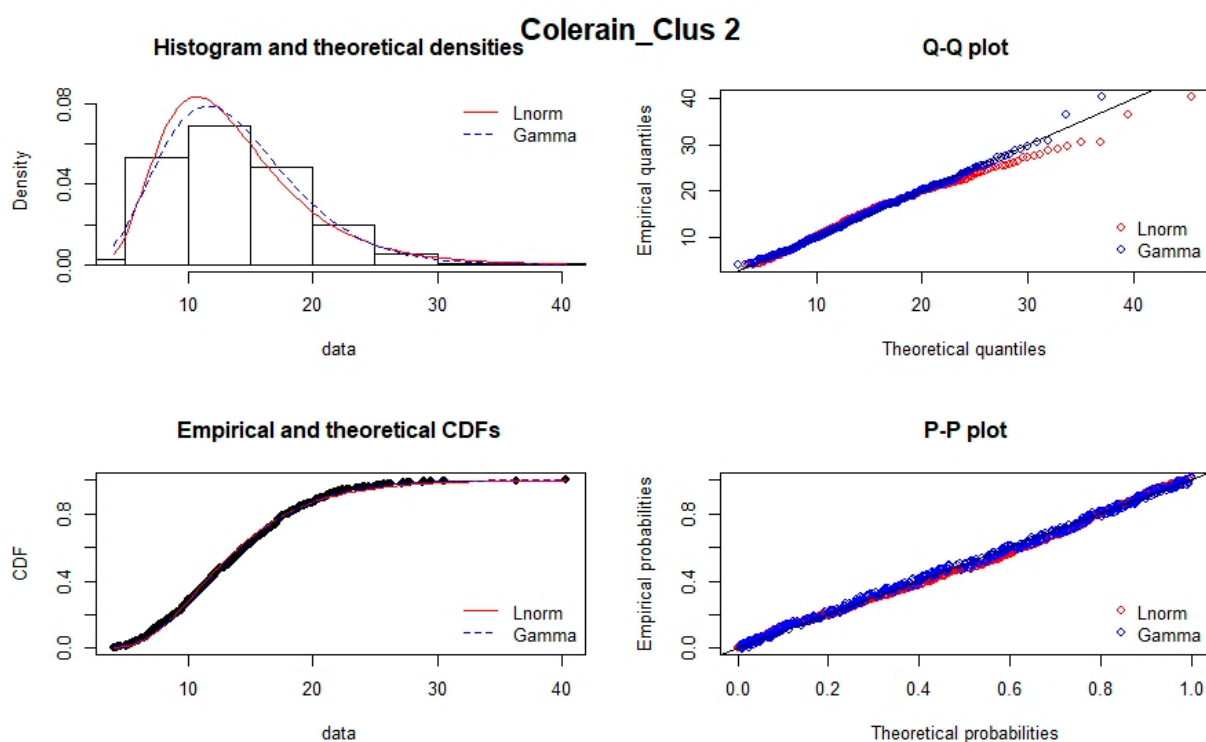

Figure S18. Comparison of Gamma and Lognormal distribution at Colerain\_Clus2.

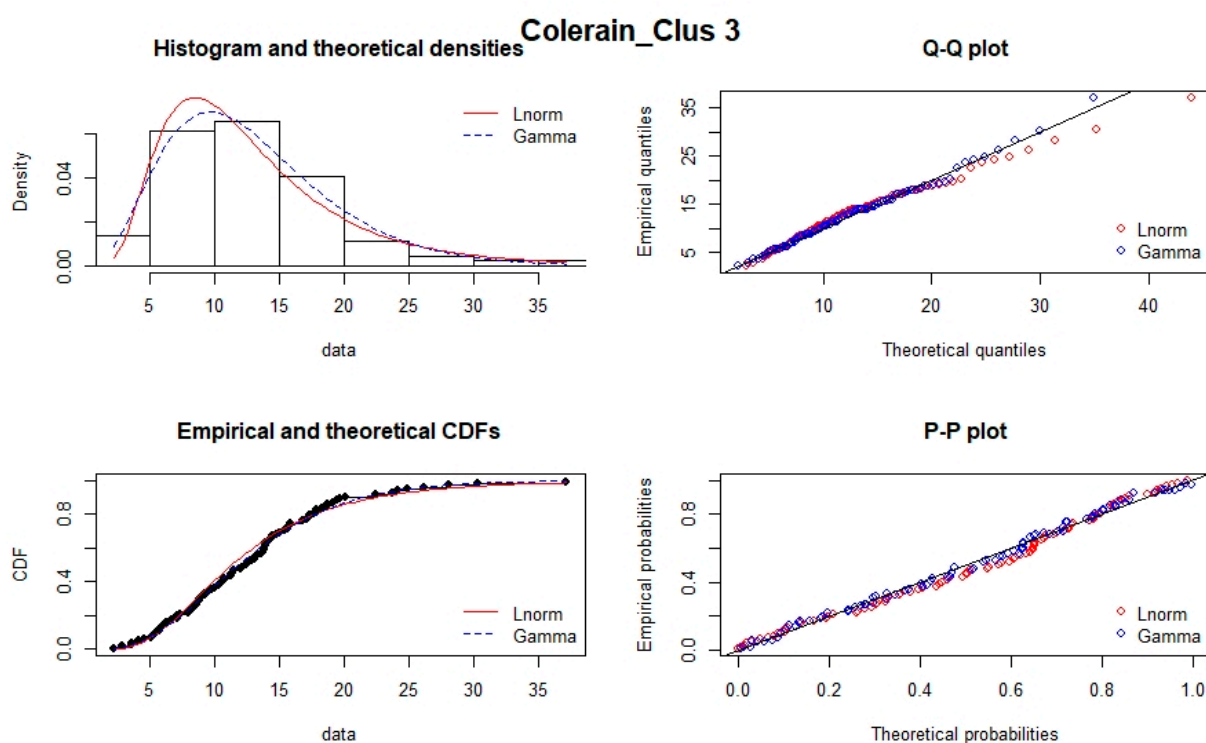

Figure S19. Comparison of Gamma and Lognormal distribution at Colerain\_Clus3.

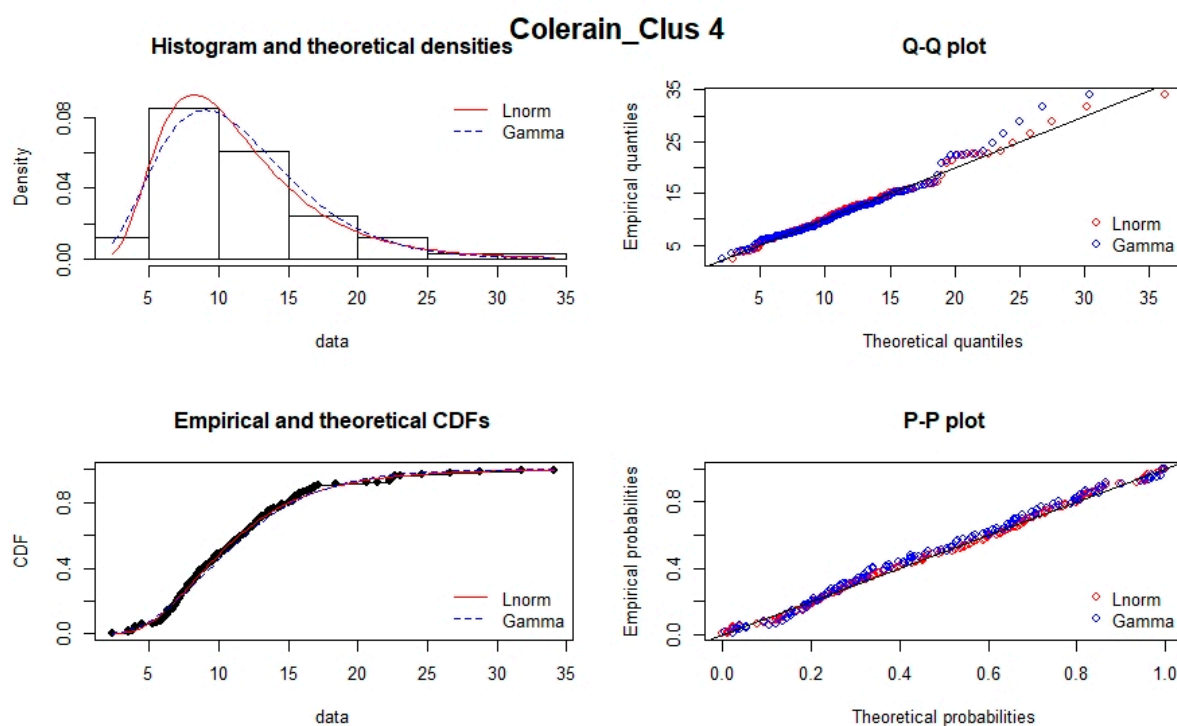

Figure S20. Comparison of Gamma and Lognormal distribution at Colerain\_Clus4.

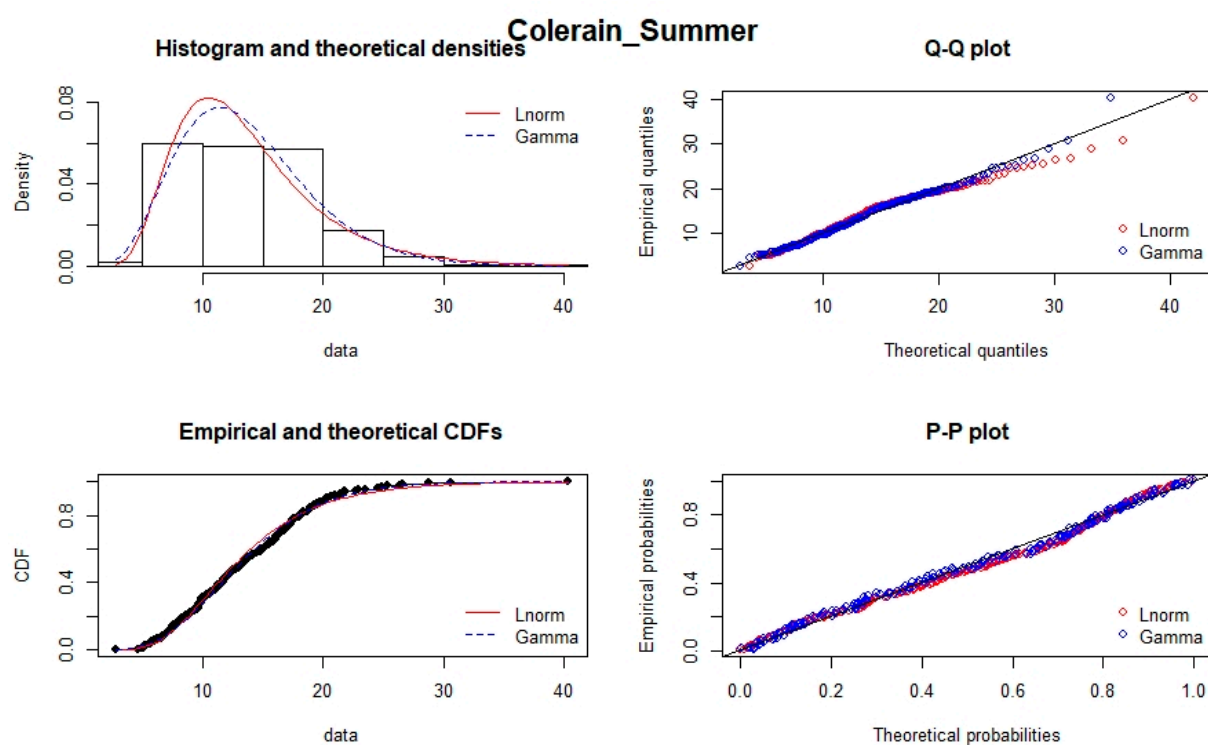

Figure S21. Comparison of Gamma and Lognormal distribution at Colerain\_Summer.

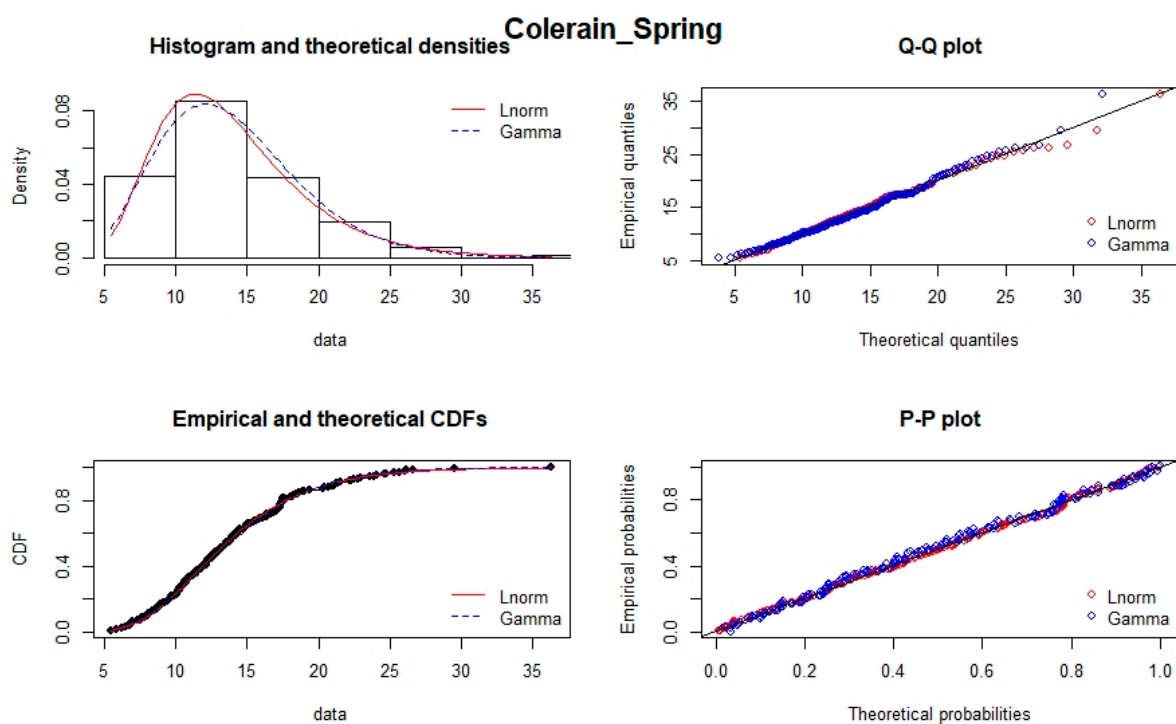

Figure S22. Comparison of Gamma and Lognormal distribution at Colerain\_Summer.

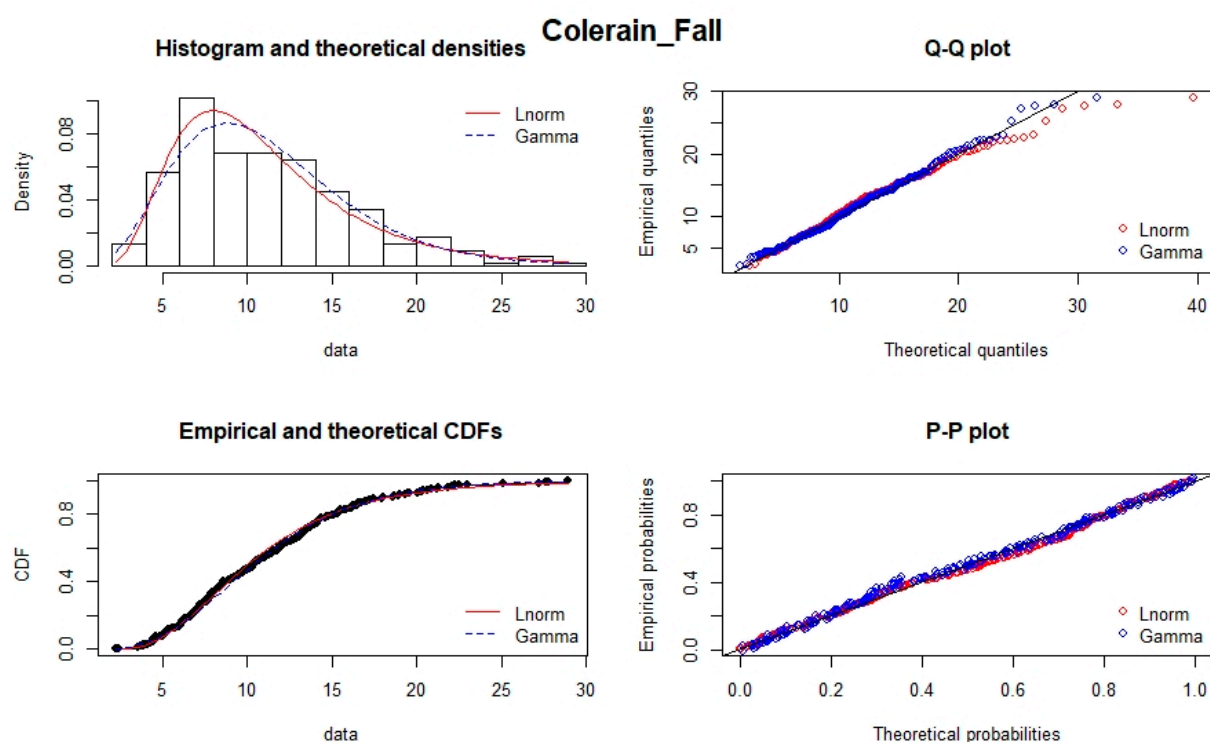

Figure S23. Comparison of Gamma and Lognormal distribution at Colerain\_Fall.

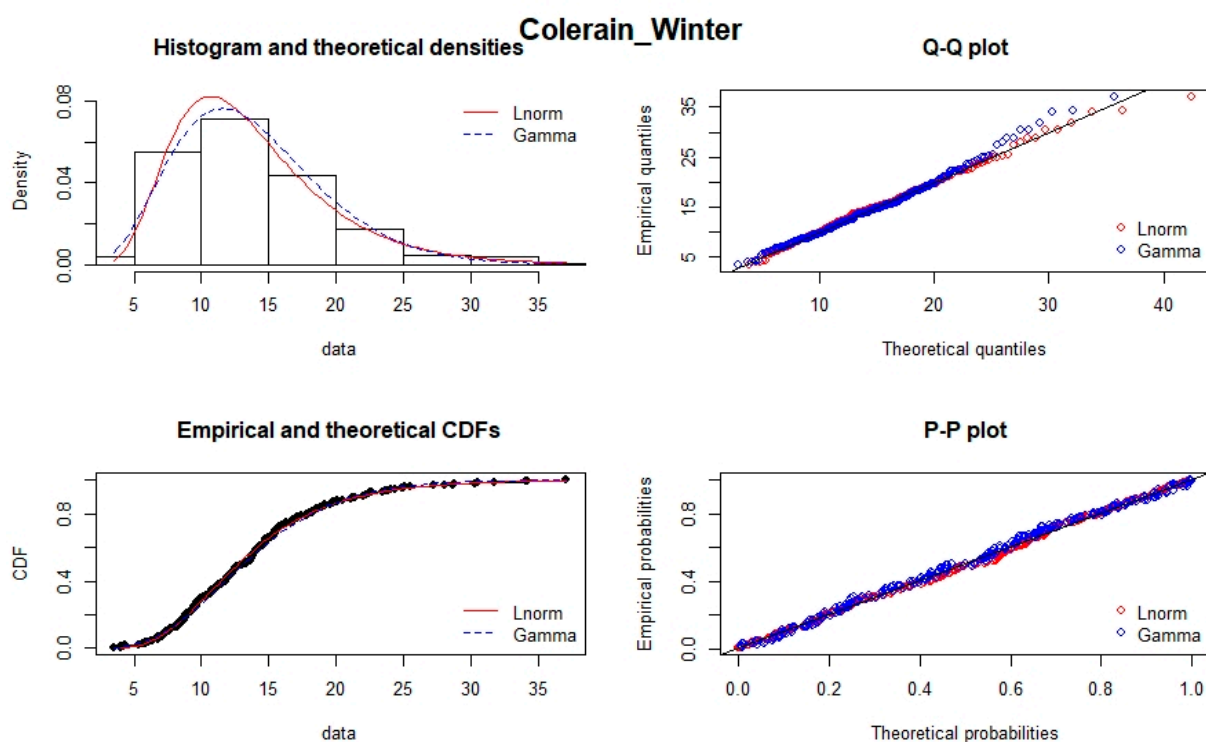

Figure S24. Comparison of Gamma and Lognormal distribution at Colerain\_Winter.

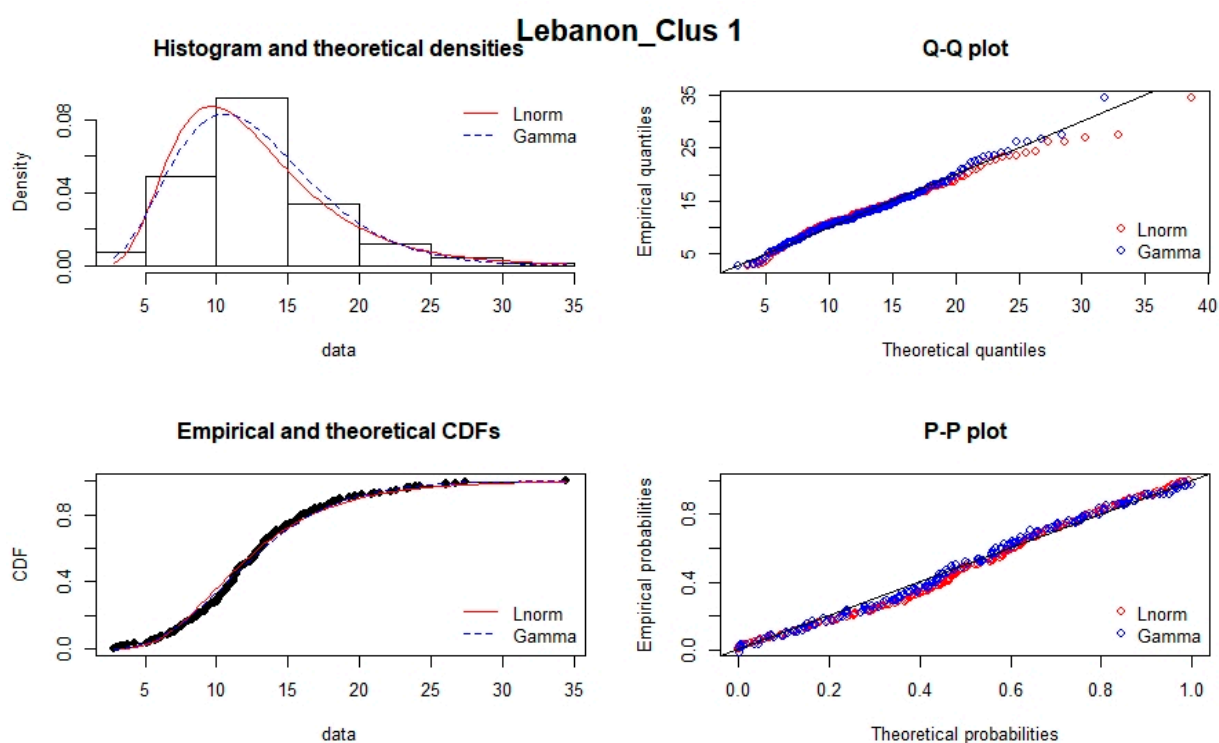

Figure S25. Comparison of Gamma and Lognormal distribution at Lebanon\_Clus1.

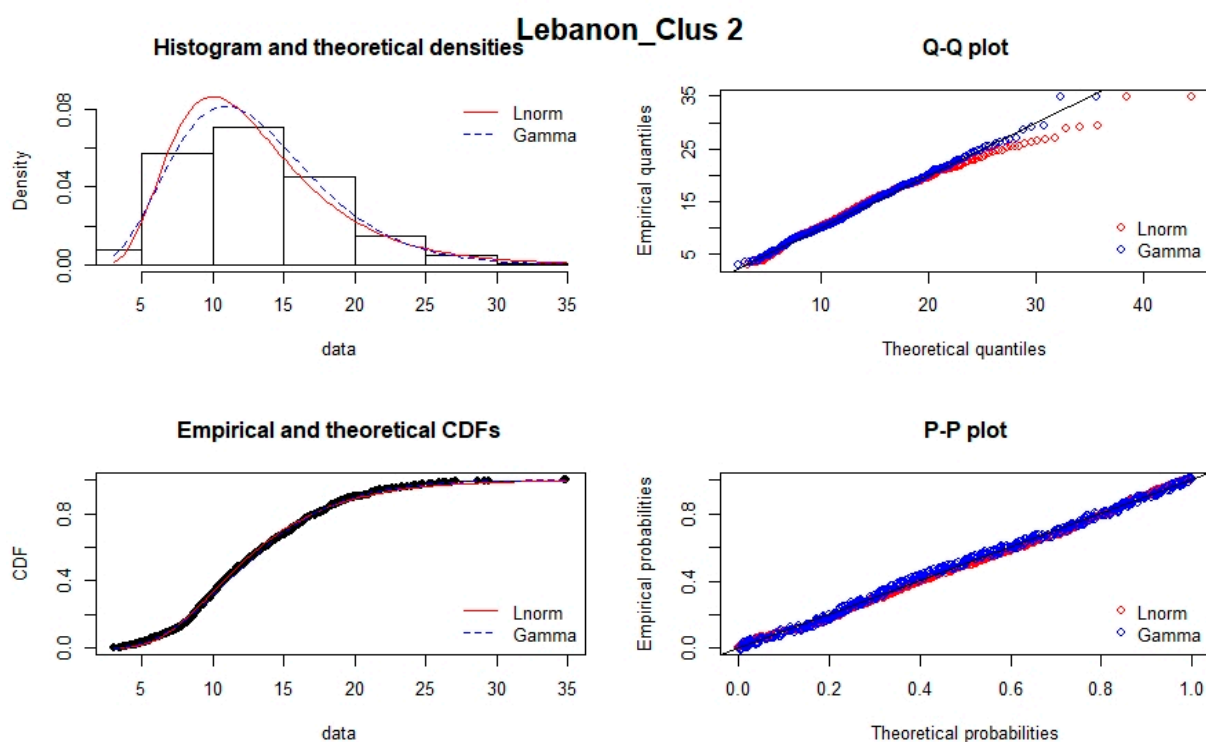

Figure S26. Comparison of Gamma and Lognormal distribution at Lebanon\_Clus2.

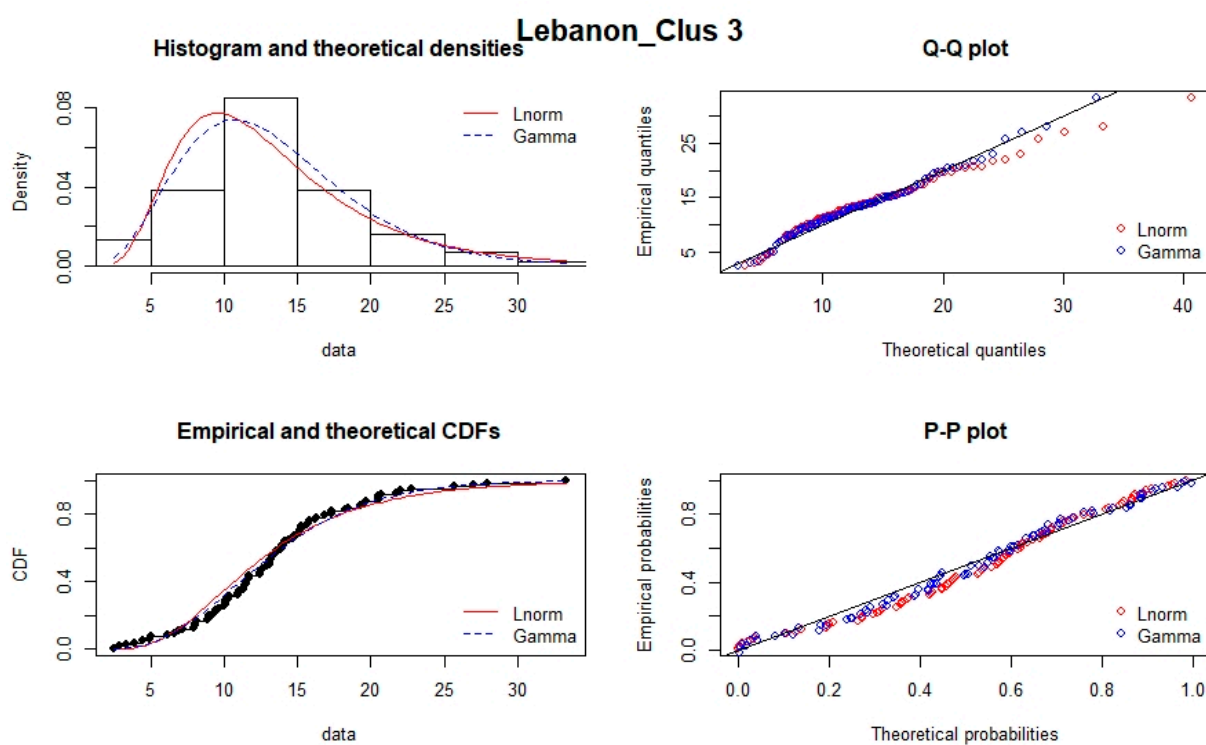

Figure S27. Comparison of Gamma and Lognormal distribution at Lebanon\_Clus3.

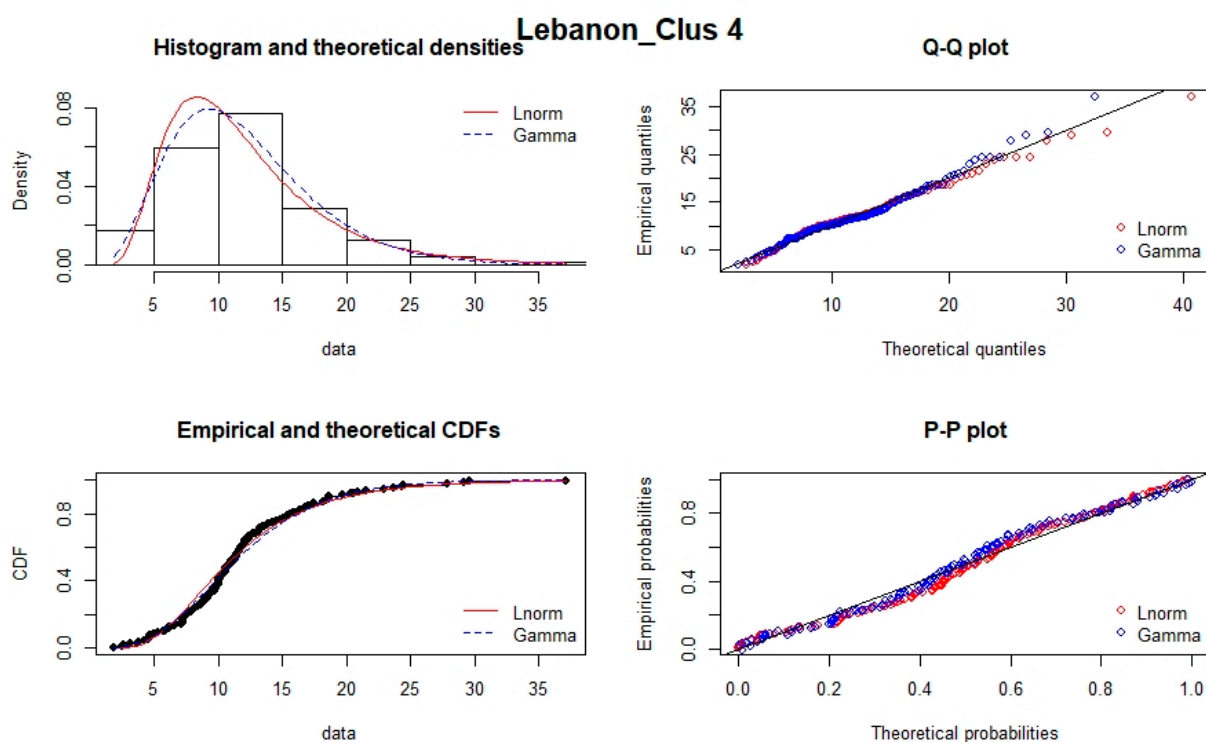

Figure S28. Comparison of Gamma and Lognormal distribution at Lebanon\_Clus4.

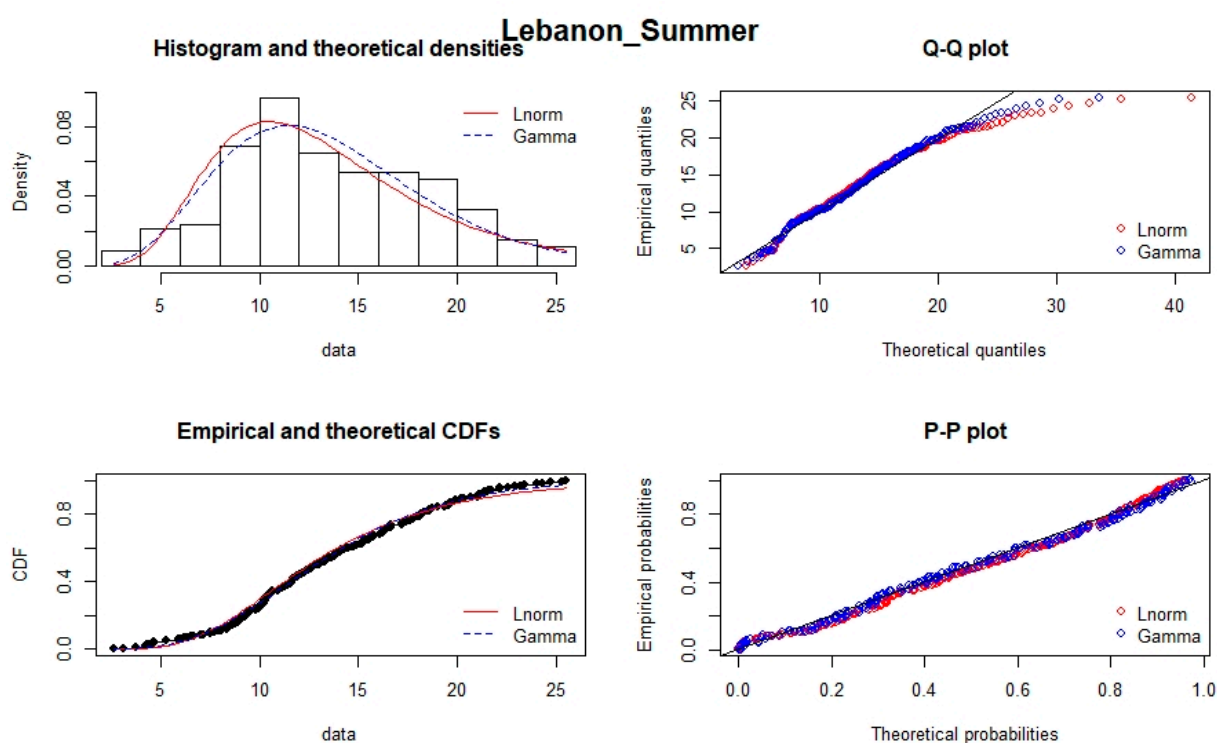

Figure S29. Comparison of Gamma and Lognormal distribution at Lebanon\_Summer.



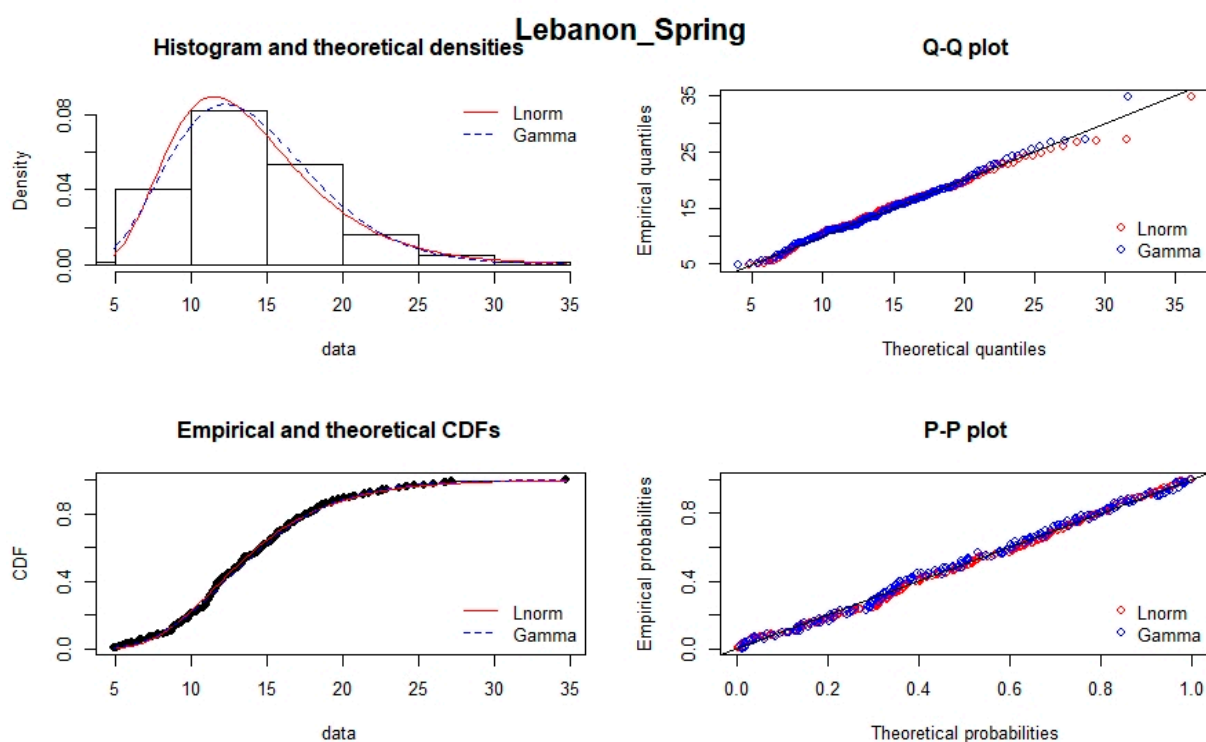

Figure S30. Comparison of Gamma and Lognormal distribution at Lebanon\_Spring.

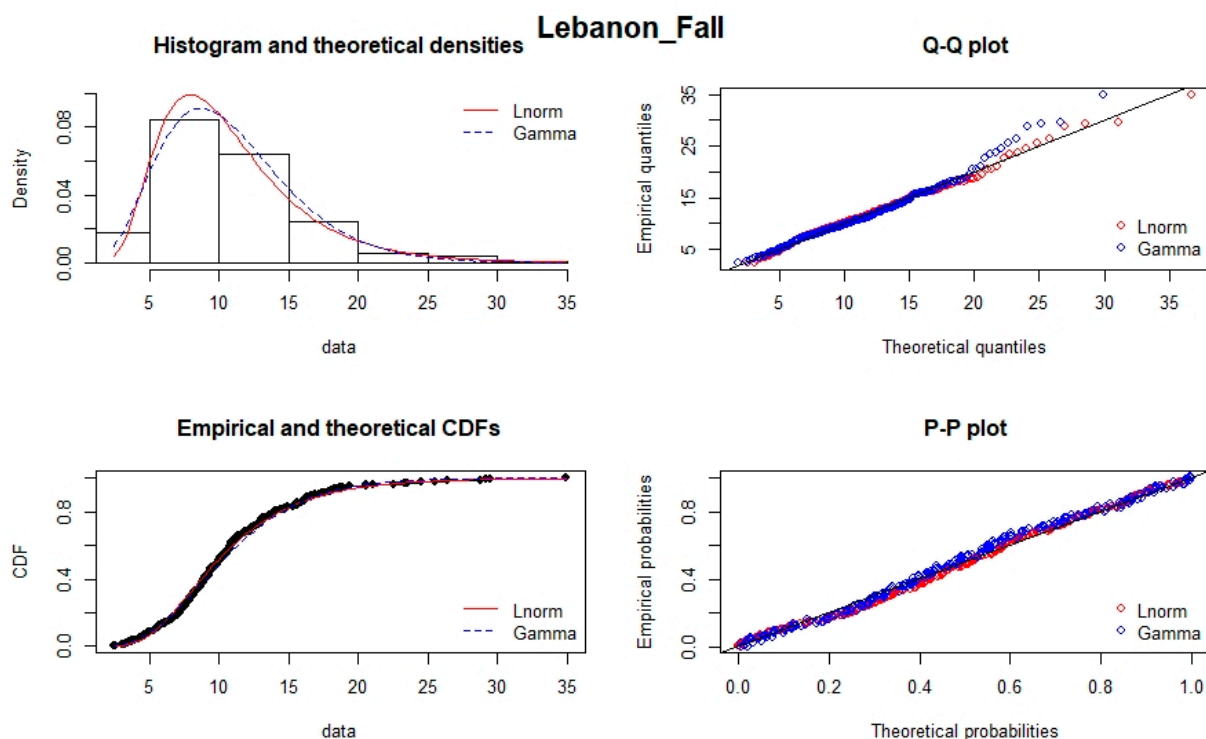

Figure S31. Comparison of Gamma and Lognormal distribution at Lebanon\_Fall.

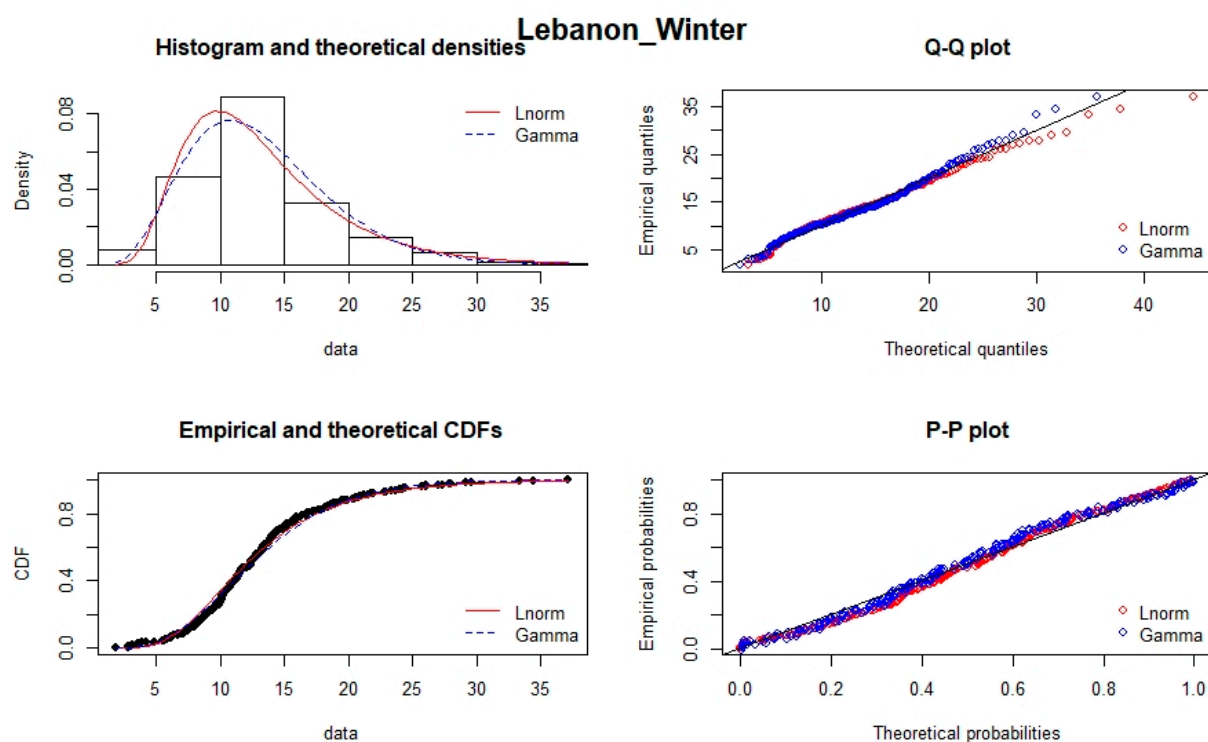

Figure S32. Comparison of Gamma and Lognormal distribution at Lebanon\_Winter.

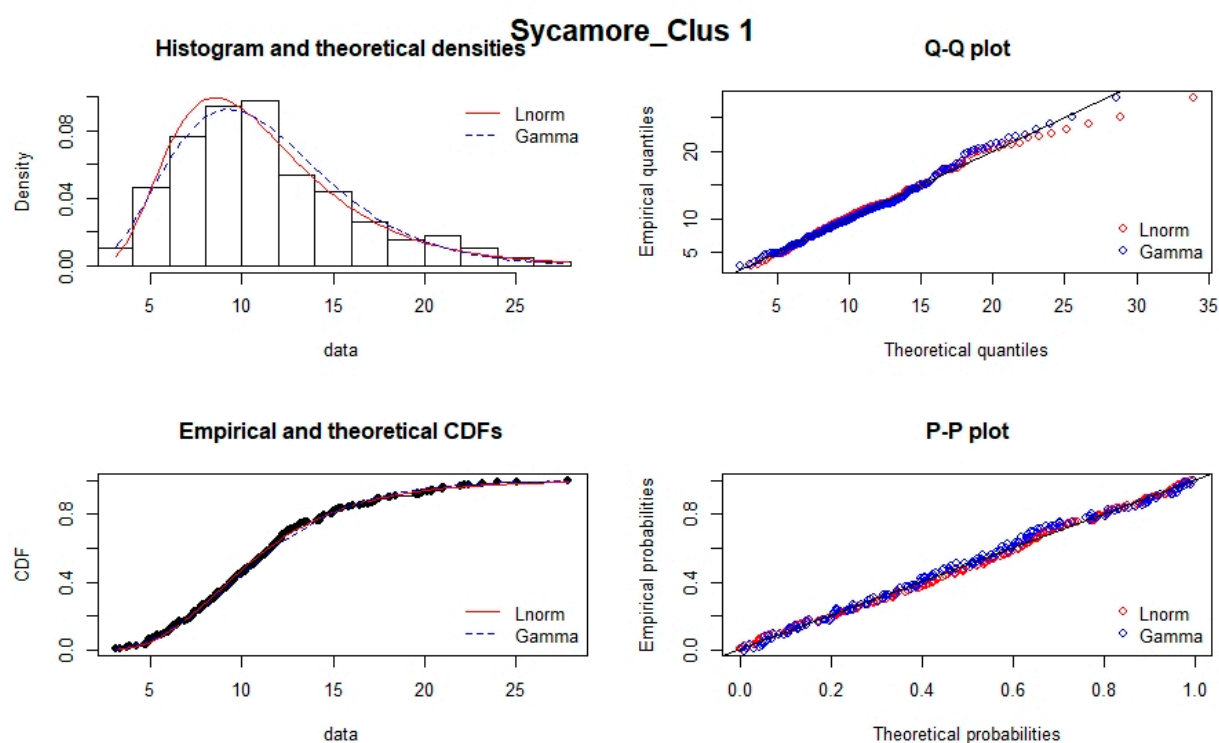

Figure S33. Comparison of Gamma and Lognormal distribution at Sycamore\_Clus1.

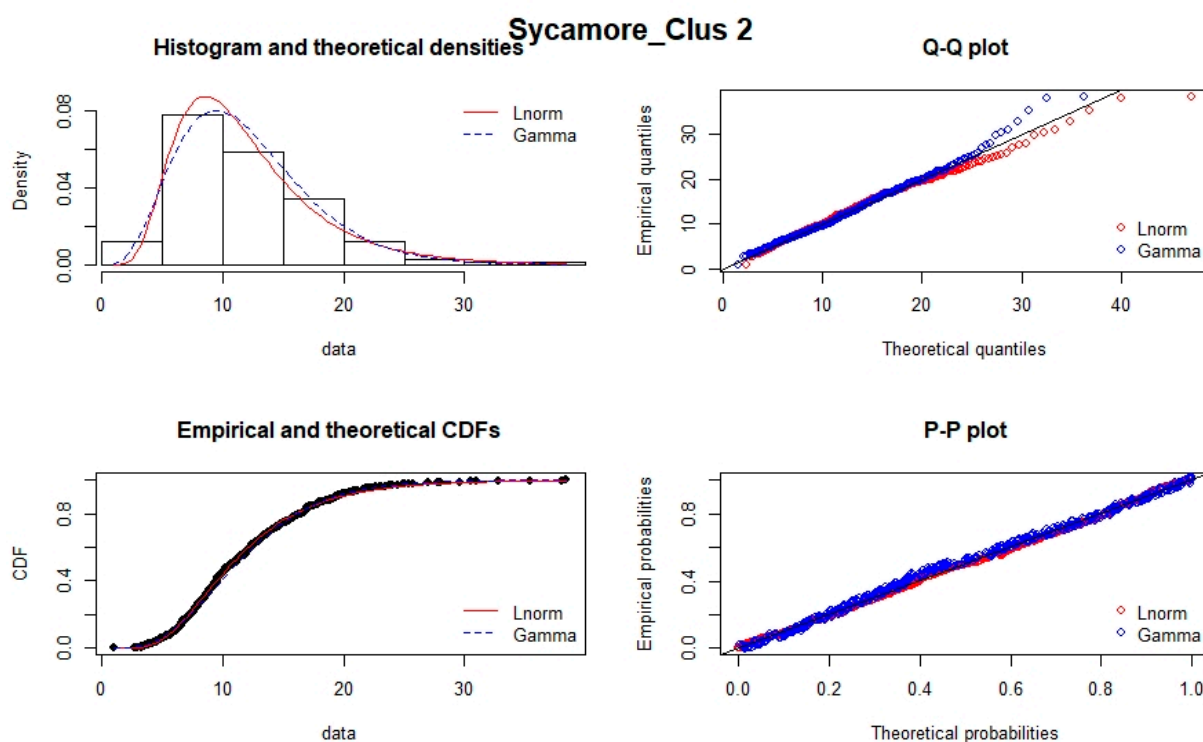

Figure S34. Comparison of Gamma and Lognormal distribution at Lebanon\_Clus2.

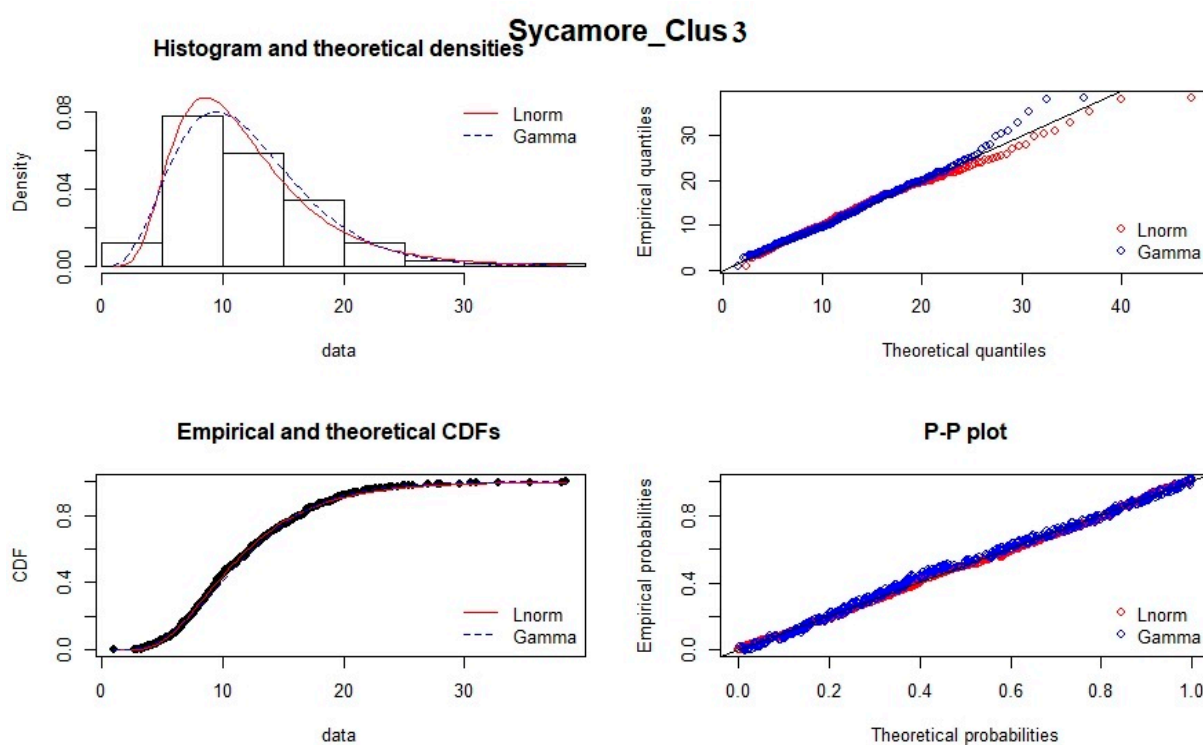

Figure S35. Comparison of Gamma and Lognormal distribution at Lebanon\_Clus3.

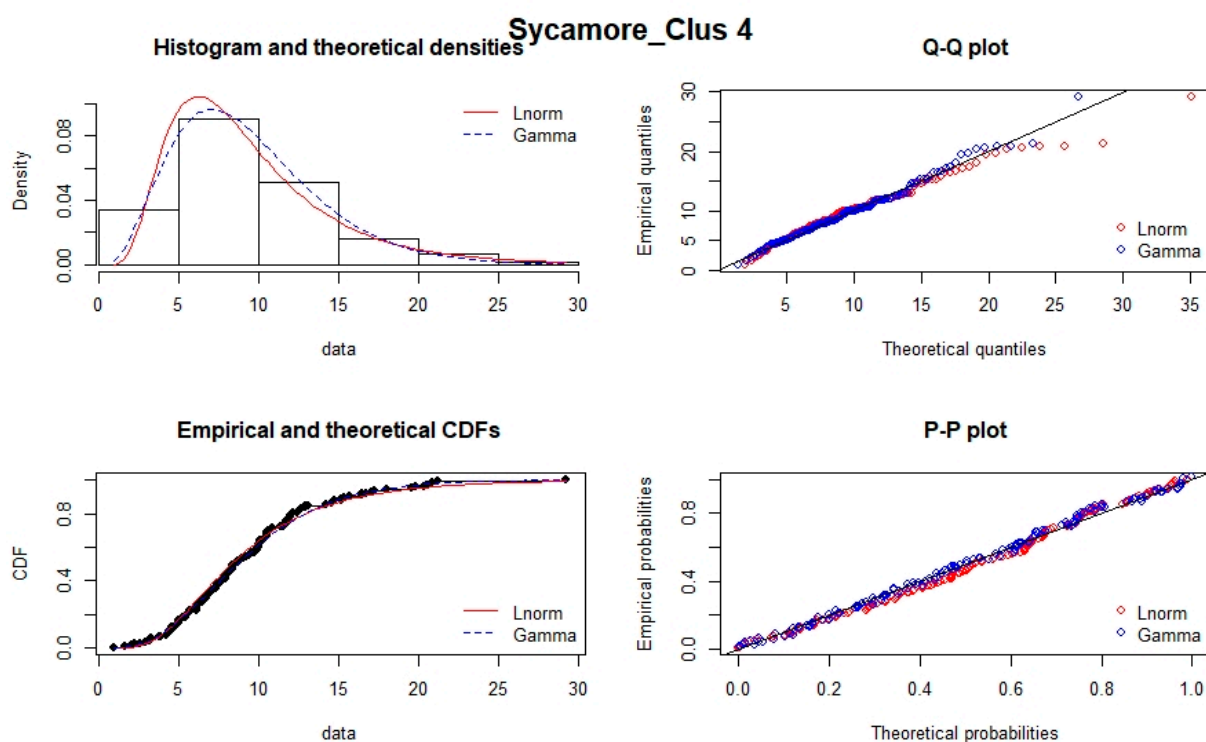

Figure S36. Comparison of Gamma and Lognormal distribution at Sycamore\_Clus4.

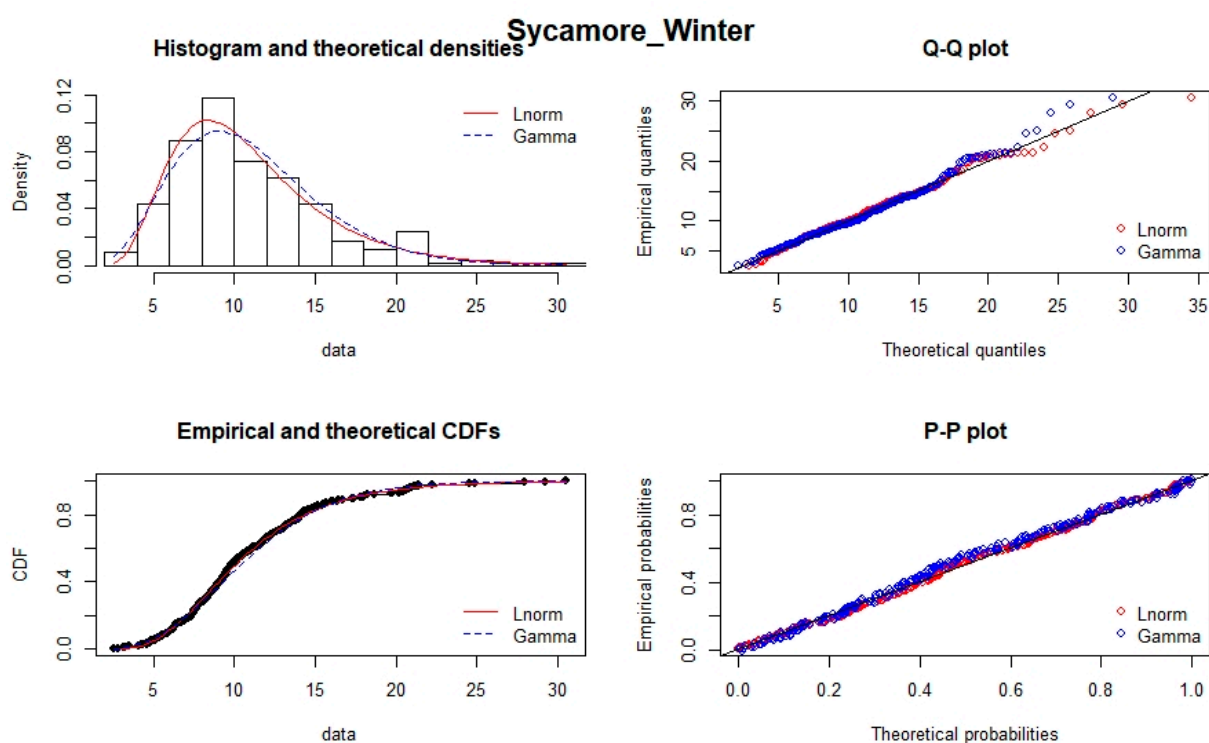

Figure S37. Comparison of Gamma and Lognormal distribution at Sycamore\_Winter.

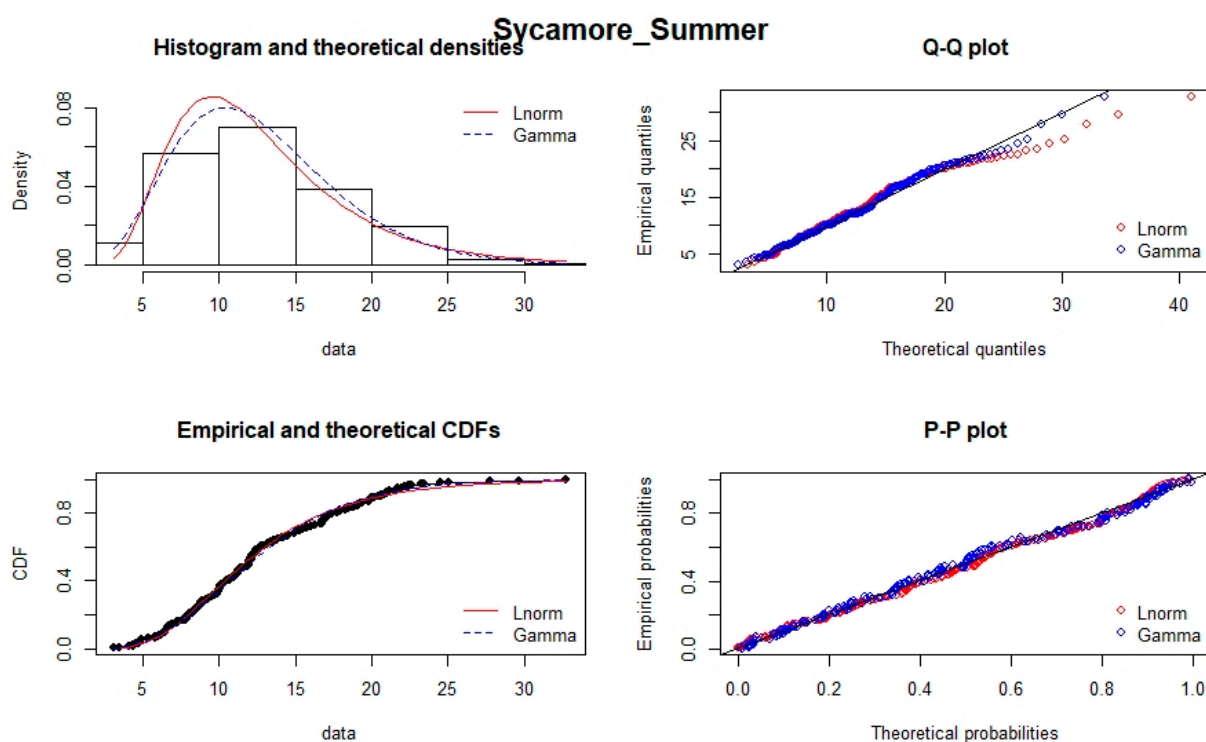

Figure S38. Comparison of Gamma and Lognormal distribution at Sycamore\_Summer.

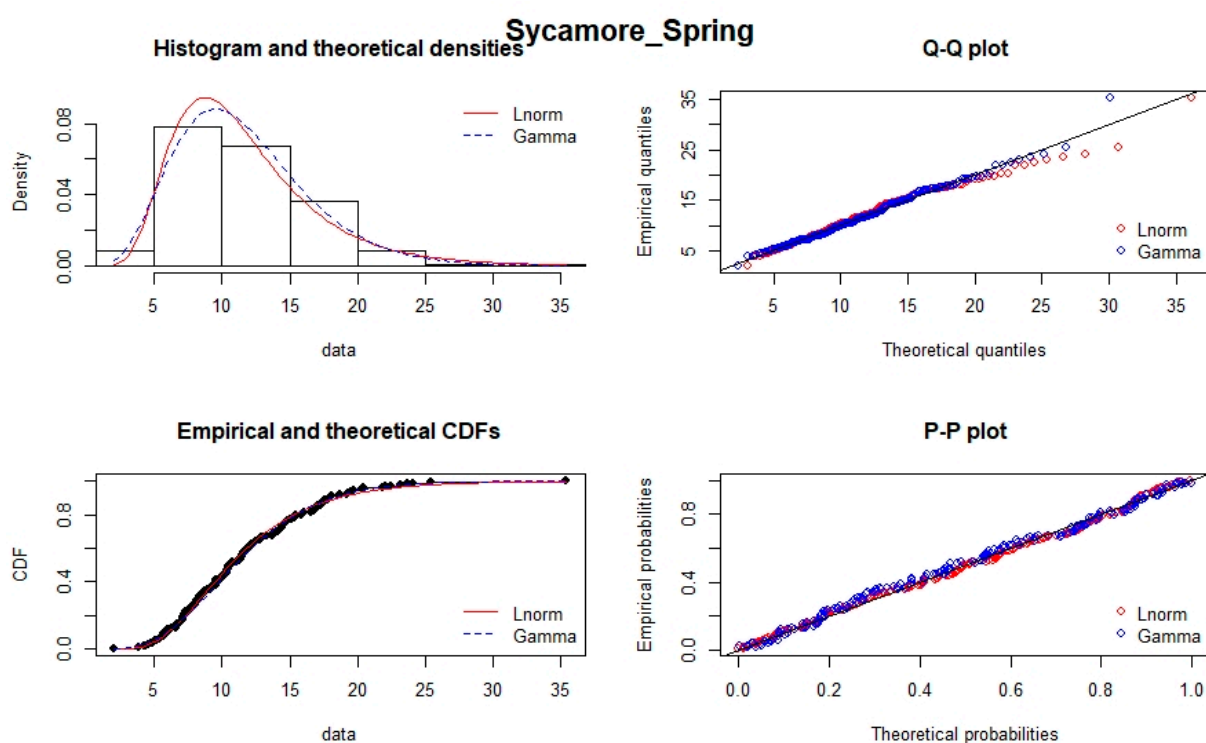

Figure S39. Comparison of Gamma and Lognormal distribution at Sycamore\_Spring.

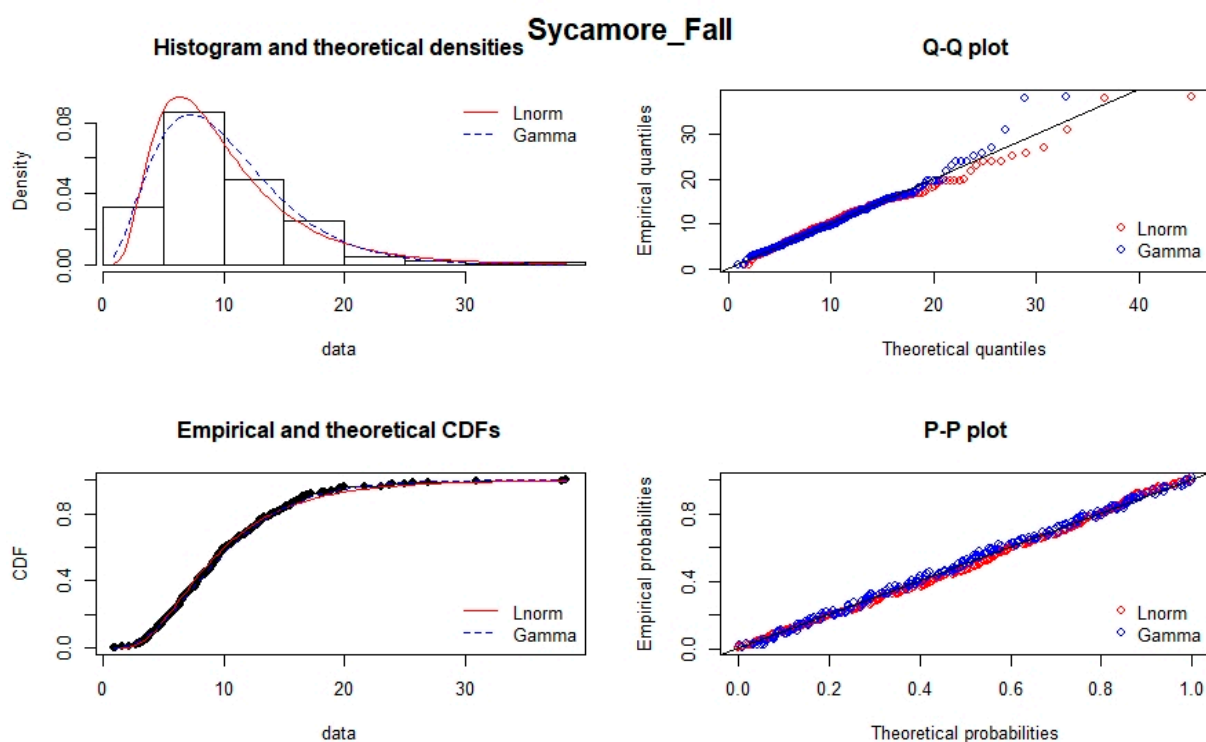

Figure S40. Comparison of Gamma and Lognormal distribution at Sycamore\_Fall.

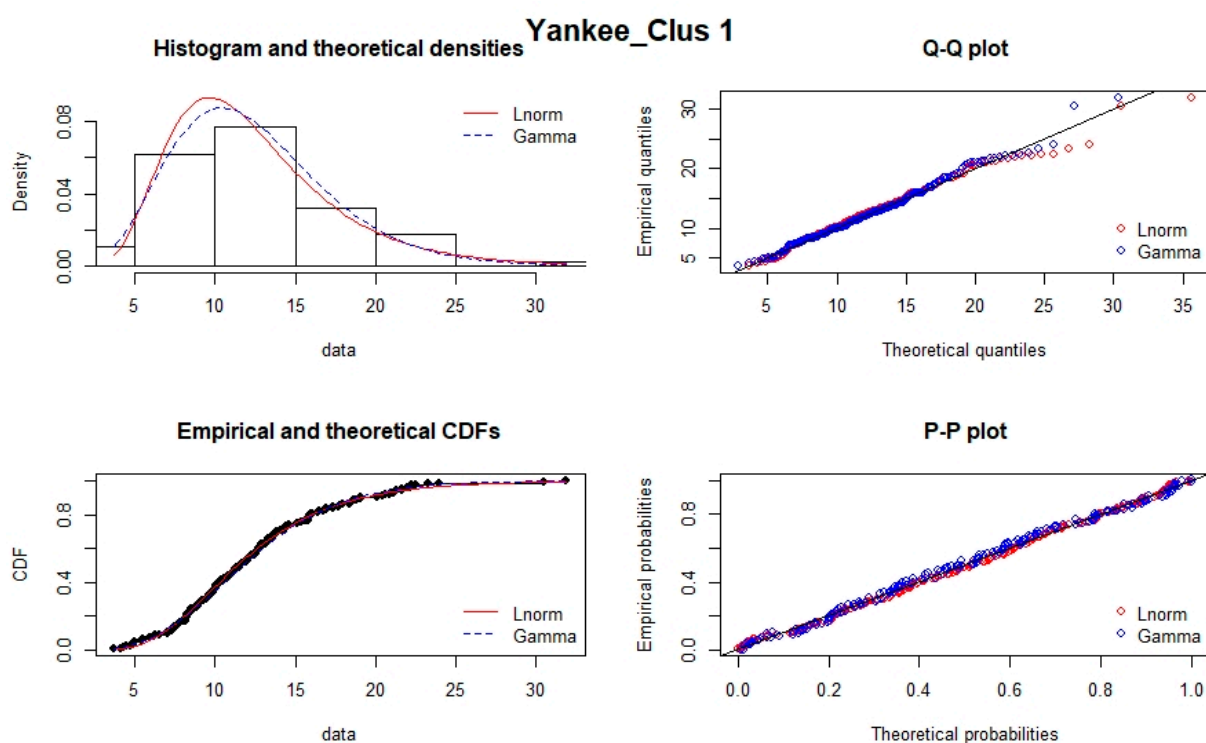

Figure S41. Comparison of Gamma and Lognormal distribution at Yankee\_Clus1.



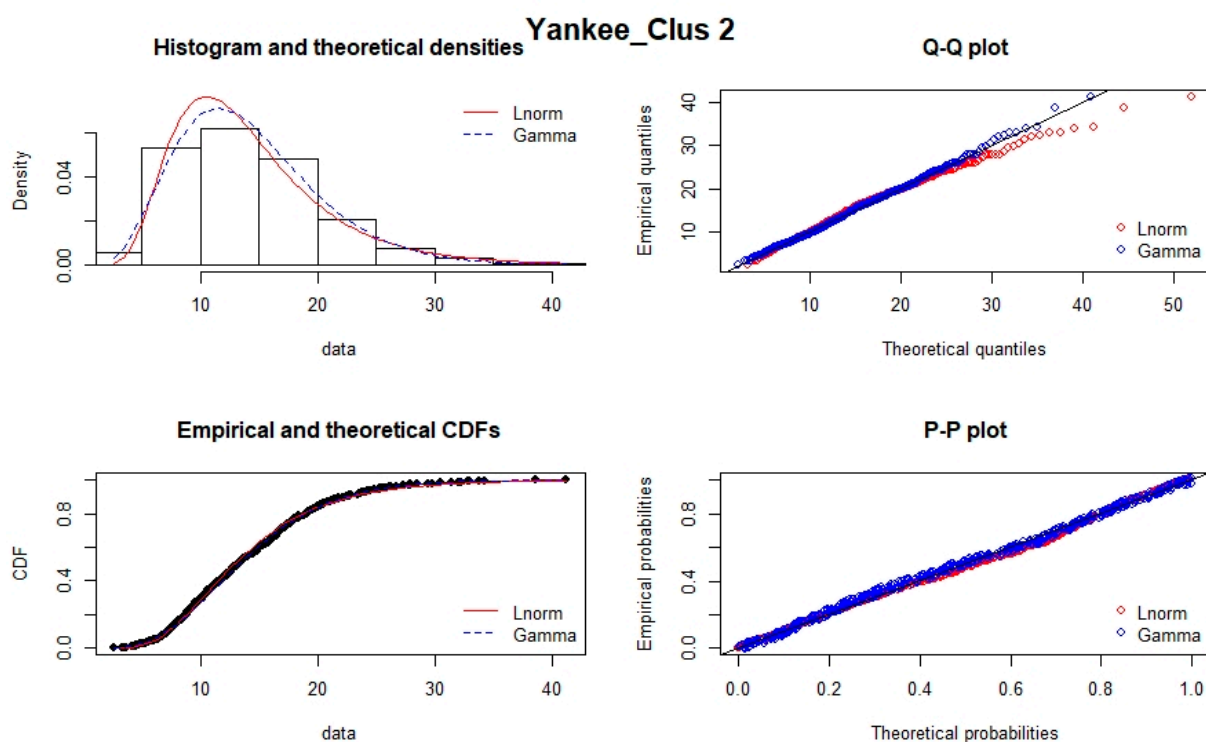

Figure S42. Comparison of Gamma and Lognormal distribution at Yankee\_Clus2.

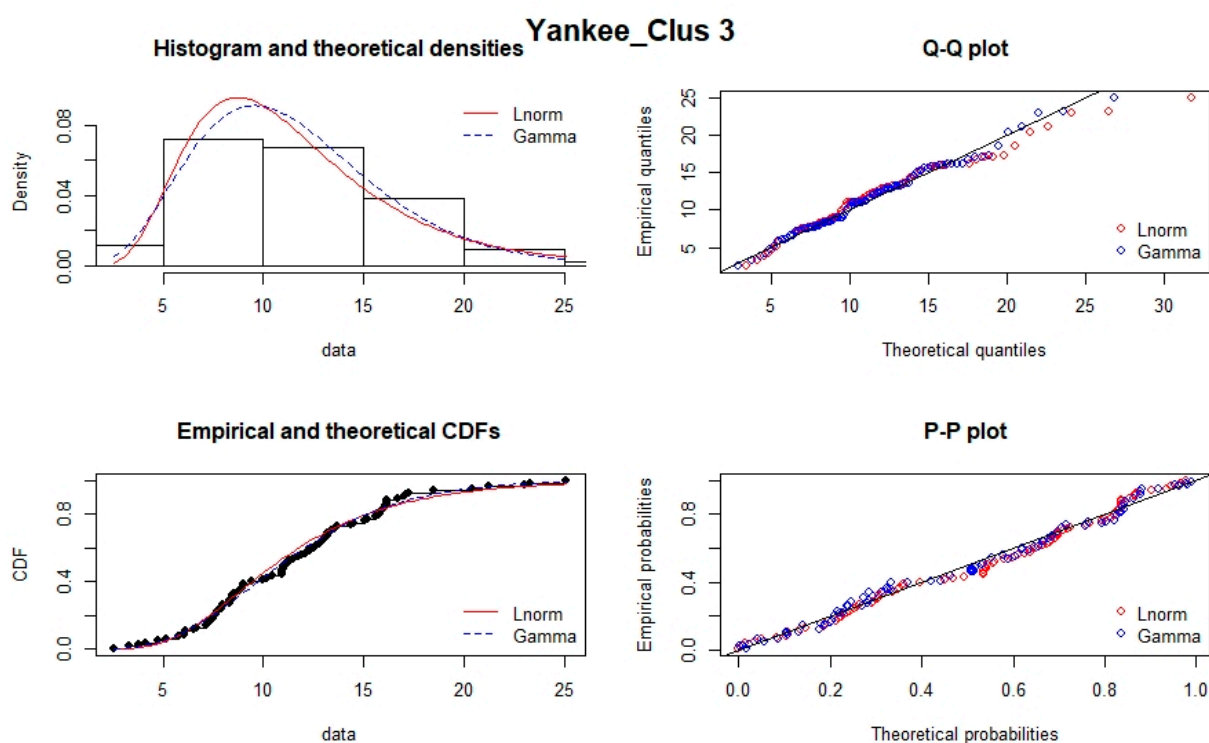

Figure S43. Comparison of Gamma and Lognormal distribution at Yankee\_Clus3.



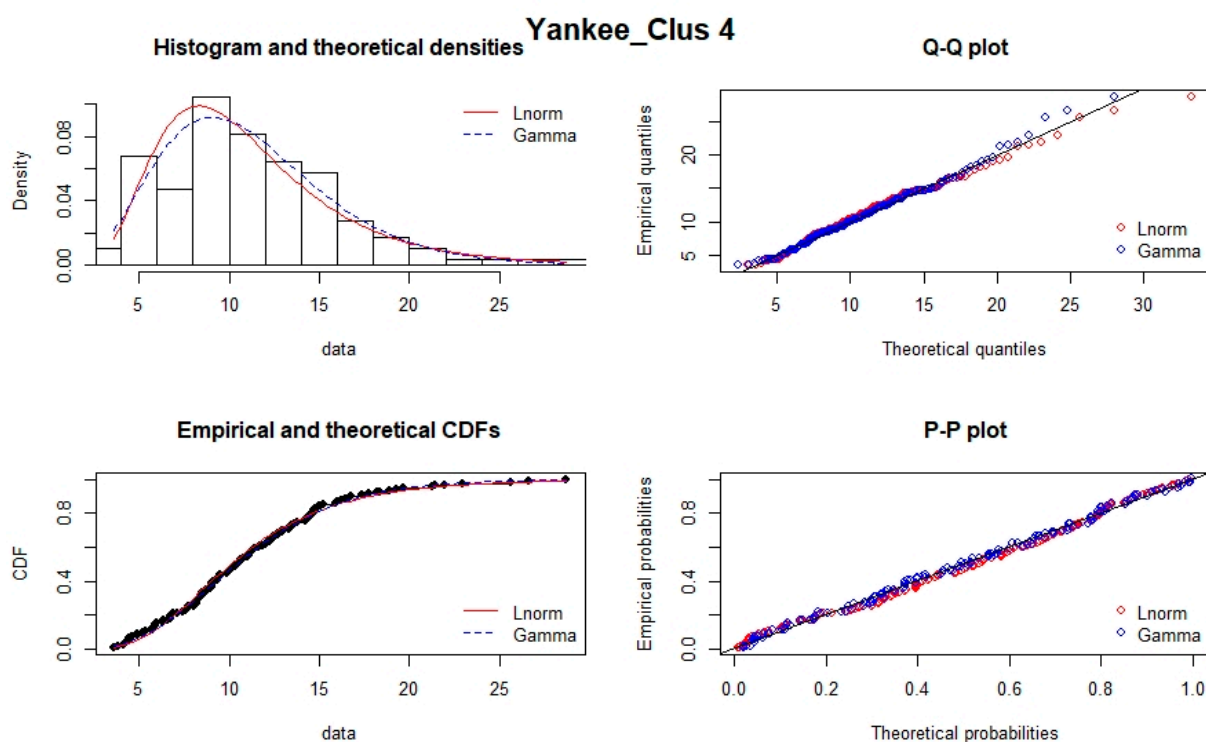

Figure S44. Comparison of Gamma and Lognormal distribution at Yankee\_Clus4.

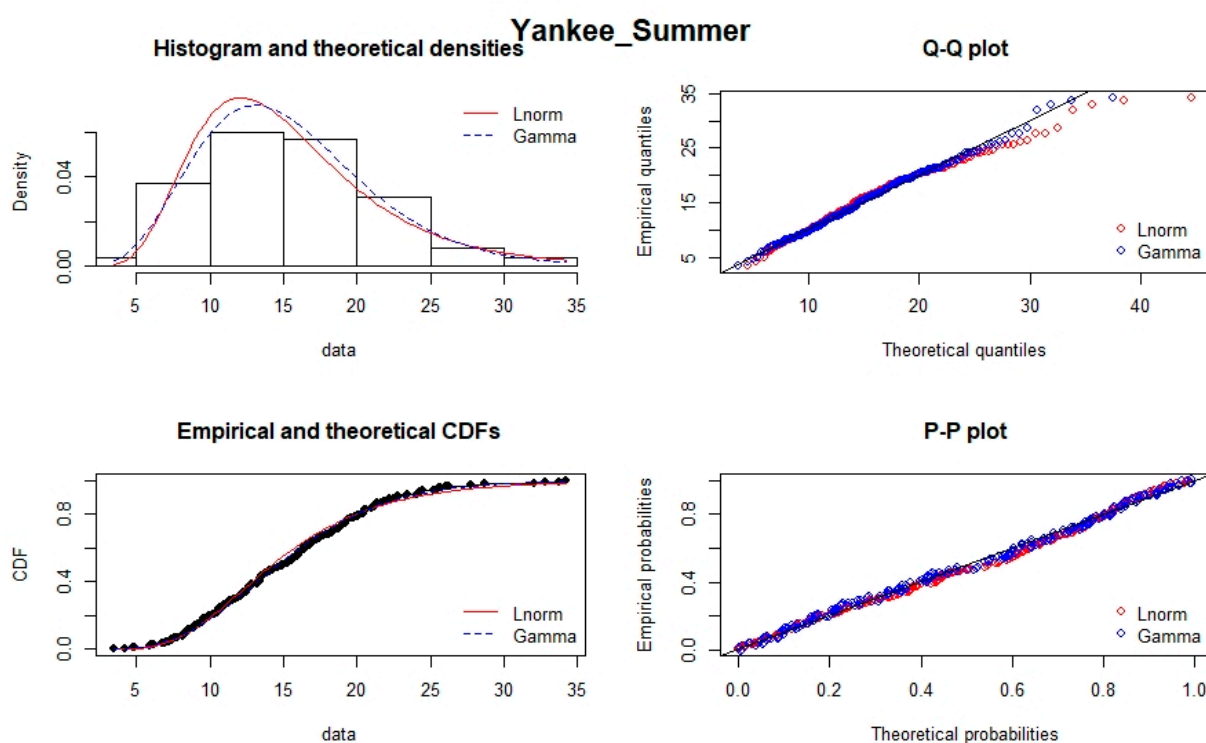

Figure S45. Comparison of Gamma and Lognormal distribution at Yankee\_Summer.

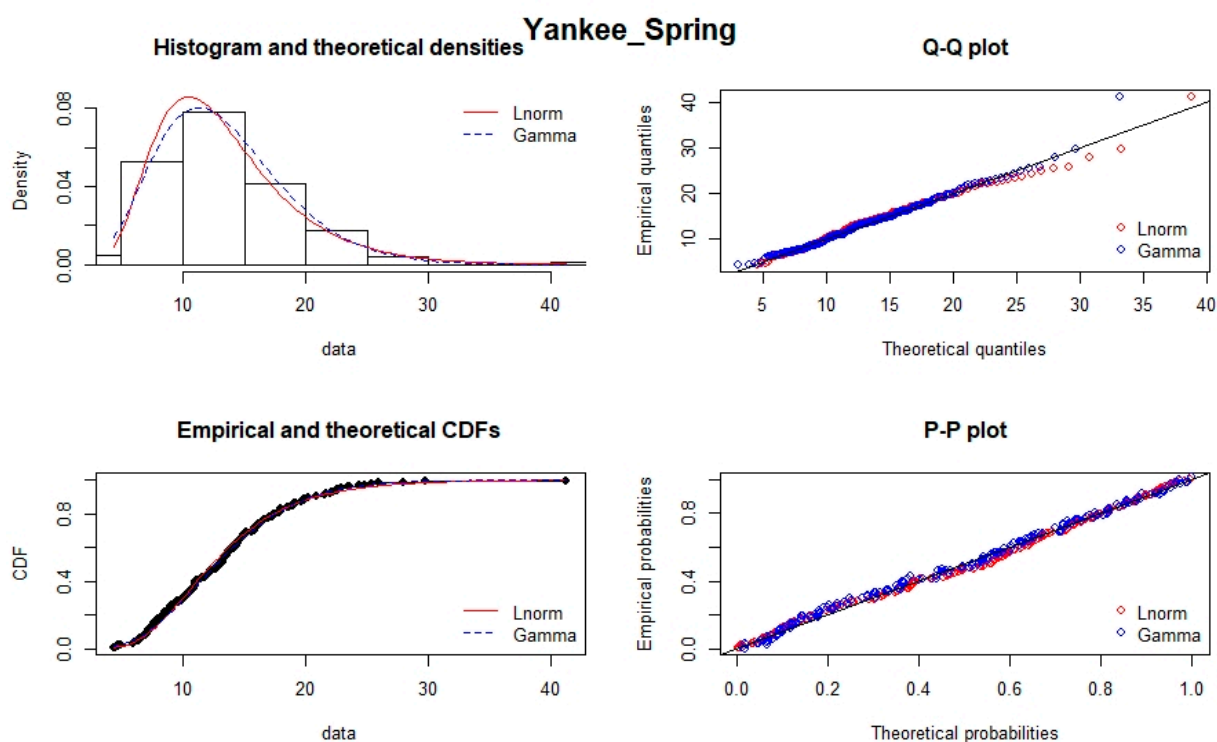

Figure S46. Comparison of Gamma and Lognormal distribution at Yankee\_Spring.

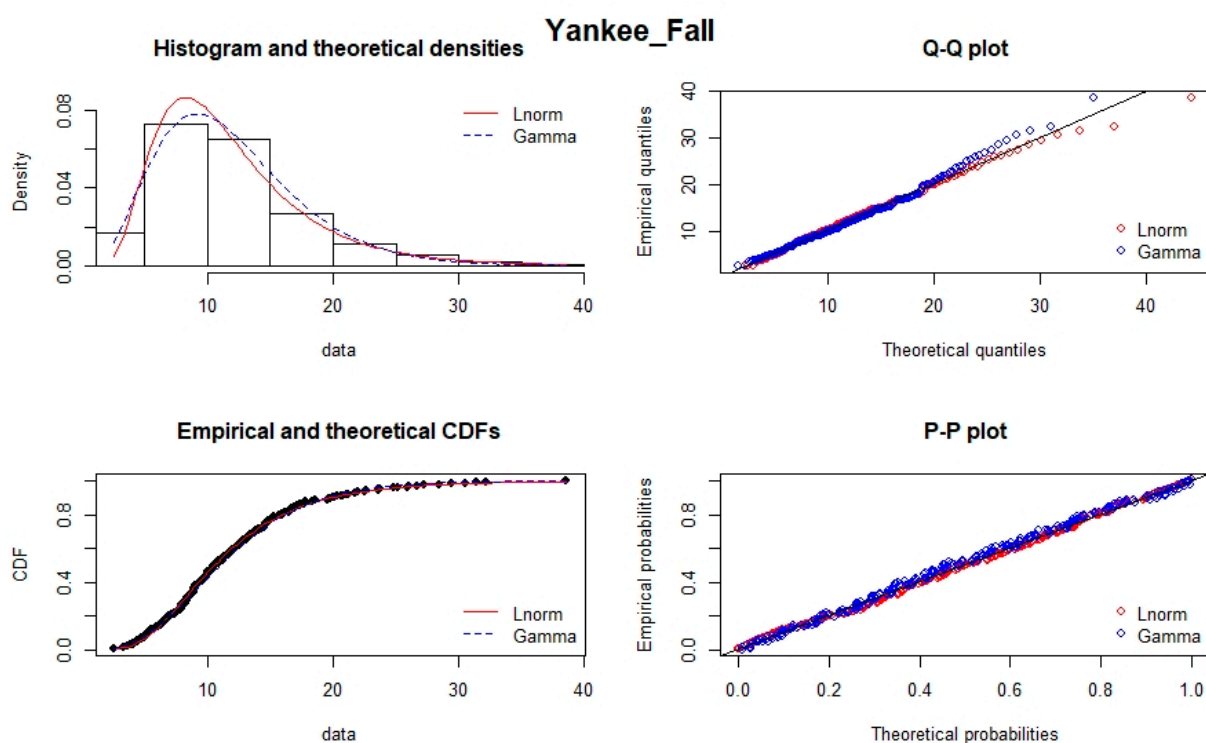

Figure S47. Comparison of Gamma and Lognormal distribution at Yankee\_ClusFall.

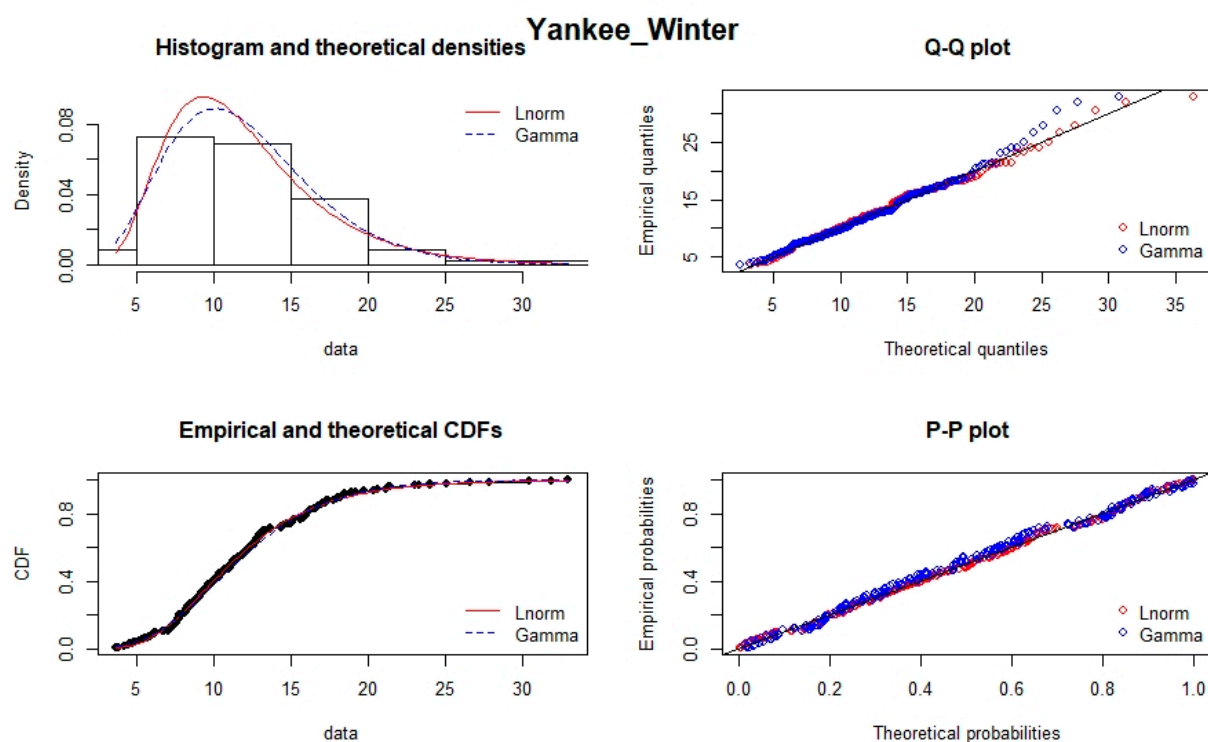

**Figure S48.** Comparison of Gamma and Lognormal distribution at Yankee\_Winter.

**Table S1.** The total variance explained by each principal component : Amanda.

| Amanda         | PC1   | PC2   | PC3   | PC4   | PC5   | PC6   | PC7   | PC8   | PC9   | PC10  | PC11  |
|----------------|-------|-------|-------|-------|-------|-------|-------|-------|-------|-------|-------|
| WS             | 0.04  | -0.03 | 0.50  | -0.19 | 0.70  | -0.12 | 0.23  | -0.32 | 0.23  | 0.05  | 0.00  |
| RH             | 0.40  | -0.12 | -0.18 | 0.19  | -0.15 | -0.40 | 0.56  | 0.00  | 0.02  | 0.51  | 0.00  |
| BP             | -0.31 | -0.22 | -0.18 | -0.25 | -0.07 | 0.57  | 0.63  | -0.15 | -0.10 | -0.05 | 0.01  |
| SR             | -0.28 | 0.43  | -0.30 | -0.30 | 0.08  | -0.04 | -0.22 | -0.38 | -0.17 | 0.57  | 0.01  |
| OT             | 0.03  | 0.50  | -0.45 | 0.04  | 0.14  | -0.28 | 0.29  | -0.15 | 0.13  | -0.57 | 0.00  |
| APCP           | 0.47  | 0.06  | -0.17 | -0.25 | 0.07  | 0.30  | -0.11 | 0.08  | 0.23  | 0.04  | 0.72  |
| HPBL           | 0.13  | 0.48  | 0.35  | -0.31 | -0.02 | 0.01  | 0.24  | 0.48  | -0.49 | 0.00  | -0.02 |
| PRATE          | 0.46  | 0.07  | -0.18 | -0.26 | 0.06  | 0.32  | -0.10 | 0.06  | 0.27  | 0.06  | -0.69 |
| uwind.10<br>m  | 0.03  | 0.32  | 0.45  | -0.05 | -0.63 | 0.04  | 0.09  | -0.38 | 0.37  | -0.04 | 0.02  |
| VIS            | -0.42 | 0.24  | -0.02 | 0.17  | 0.11  | 0.08  | 0.12  | 0.54  | 0.59  | 0.26  | 0.02  |
| vwind.10<br>m  | 0.17  | 0.32  | 0.08  | 0.72  | 0.19  | 0.47  | 0.03  | -0.18 | -0.20 | 0.11  | 0.00  |
| Explained<br>% | 31.98 | 16.97 | 16.18 | 8.65  | 7.80  | 5.99  | 4.97  | 3.38  | 2.90  | 0.98  | 0.20  |

**Table S2.** The total variance explained by each principal component: Batavia.

| Batavia   | PC1   | PC2   | PC3   | PC4   | PC5   | PC6   | PC7   | PC8   | PC9   | PC10  | PC11  |
|-----------|-------|-------|-------|-------|-------|-------|-------|-------|-------|-------|-------|
| WS        | 0.04  | -0.03 | 0.50  | -0.19 | 0.70  | -0.12 | 0.23  | -0.32 | 0.23  | 0.05  | 0.00  |
| RH        | 0.40  | -0.12 | -0.18 | 0.19  | -0.15 | -0.40 | 0.56  | 0.00  | 0.02  | 0.51  | 0.00  |
| BP        | -0.31 | -0.22 | -0.18 | -0.25 | -0.07 | 0.57  | 0.63  | -0.15 | -0.10 | -0.05 | 0.01  |
| SR        | -0.28 | 0.43  | -0.30 | -0.30 | 0.08  | -0.04 | -0.22 | -0.38 | -0.17 | 0.57  | 0.01  |
| OT        | 0.03  | 0.50  | -0.45 | 0.04  | 0.14  | -0.28 | 0.29  | -0.15 | 0.13  | -0.57 | 0.00  |
| APCP      | 0.47  | 0.06  | -0.17 | -0.25 | 0.07  | 0.30  | -0.11 | 0.08  | 0.23  | 0.04  | 0.72  |
| HPBL      | 0.13  | 0.48  | 0.35  | -0.31 | -0.02 | 0.01  | 0.24  | 0.48  | -0.49 | 0.00  | -0.02 |
| PRATE     | 0.46  | 0.07  | -0.18 | -0.26 | 0.06  | 0.32  | -0.10 | 0.06  | 0.27  | 0.06  | -0.69 |
| uwind.10m | 0.03  | 0.32  | 0.45  | -0.05 | -0.63 | 0.04  | 0.09  | -0.38 | 0.37  | -0.04 | 0.02  |

|             |       |       |       |      |      |      |      |       |       |      |      |
|-------------|-------|-------|-------|------|------|------|------|-------|-------|------|------|
| VIS         | -0.42 | 0.24  | -0.02 | 0.17 | 0.11 | 0.08 | 0.12 | 0.54  | 0.59  | 0.26 | 0.02 |
| vwind.10m   | 0.17  | 0.32  | 0.08  | 0.72 | 0.19 | 0.47 | 0.03 | -0.18 | -0.20 | 0.11 | 0.00 |
| Explained % | 31.98 | 16.97 | 16.18 | 8.65 | 7.80 | 5.99 | 4.97 | 3.38  | 2.90  | 0.98 | 0.20 |

**Table S3.** The total variance explained by each principal component : Colerain.

| Colerain    | PC1   | PC2   | PC3   | PC4   | PC5   | PC6   | PC7   | PC8   | PC9   | PC10  | PC11  |
|-------------|-------|-------|-------|-------|-------|-------|-------|-------|-------|-------|-------|
| WS          | 0.04  | -0.03 | 0.50  | -0.19 | 0.70  | -0.12 | 0.23  | -0.32 | 0.23  | 0.05  | 0.00  |
| RH          | 0.40  | -0.12 | -0.18 | 0.19  | -0.15 | -0.40 | 0.56  | 0.00  | 0.02  | 0.51  | 0.00  |
| BP          | -0.31 | -0.22 | -0.18 | -0.25 | -0.07 | 0.57  | 0.63  | -0.15 | -0.10 | -0.05 | 0.01  |
| SR          | -0.28 | 0.43  | -0.30 | -0.30 | 0.08  | -0.04 | -0.22 | -0.38 | -0.17 | 0.57  | 0.01  |
| OT          | 0.03  | 0.50  | -0.45 | 0.04  | 0.14  | -0.28 | 0.29  | -0.15 | 0.13  | -0.57 | 0.00  |
| APCP        | 0.47  | 0.06  | -0.17 | -0.25 | 0.07  | 0.30  | -0.11 | 0.08  | 0.23  | 0.04  | 0.72  |
| HPBL        | 0.13  | 0.48  | 0.35  | -0.31 | -0.02 | 0.01  | 0.24  | 0.48  | -0.49 | 0.00  | -0.02 |
| PRATE       | 0.46  | 0.07  | -0.18 | -0.26 | 0.06  | 0.32  | -0.10 | 0.06  | 0.27  | 0.06  | -0.69 |
| uwind.10m   | 0.03  | 0.32  | 0.45  | -0.05 | -0.63 | 0.04  | 0.09  | -0.38 | 0.37  | -0.04 | 0.02  |
| VIS         | -0.42 | 0.24  | -0.02 | 0.17  | 0.11  | 0.08  | 0.12  | 0.54  | 0.59  | 0.26  | 0.02  |
| vwind.10m   | 0.17  | 0.32  | 0.08  | 0.72  | 0.19  | 0.47  | 0.03  | -0.18 | -0.20 | 0.11  | 0.00  |
| Explained % | 31.98 | 16.97 | 16.18 | 8.65  | 7.80  | 5.99  | 4.97  | 3.38  | 2.90  | 0.98  | 0.20  |

**Table S4.** The total variance explained by each principal component : Lebanon.

| Lebanon     | PC1   | PC2   | PC3   | PC4   | PC5   | PC6   | PC7   | PC8   | PC9   | PC10  | PC11  |
|-------------|-------|-------|-------|-------|-------|-------|-------|-------|-------|-------|-------|
| WS          | 0.04  | -0.03 | 0.50  | -0.19 | 0.70  | -0.12 | 0.23  | -0.32 | 0.23  | 0.05  | 0.00  |
| RH          | 0.40  | -0.12 | -0.18 | 0.19  | -0.15 | -0.40 | 0.56  | 0.00  | 0.02  | 0.51  | 0.00  |
| BP          | -0.31 | -0.22 | -0.18 | -0.25 | -0.07 | 0.57  | 0.63  | -0.15 | -0.10 | -0.05 | 0.01  |
| SR          | -0.28 | 0.43  | -0.30 | -0.30 | 0.08  | -0.04 | -0.22 | -0.38 | -0.17 | 0.57  | 0.01  |
| OT          | 0.03  | 0.50  | -0.45 | 0.04  | 0.14  | -0.28 | 0.29  | -0.15 | 0.13  | -0.57 | 0.00  |
| APCP        | 0.47  | 0.06  | -0.17 | -0.25 | 0.07  | 0.30  | -0.11 | 0.08  | 0.23  | 0.04  | 0.72  |
| HPBL        | 0.13  | 0.48  | 0.35  | -0.31 | -0.02 | 0.01  | 0.24  | 0.48  | -0.49 | 0.00  | -0.02 |
| PRATE       | 0.46  | 0.07  | -0.18 | -0.26 | 0.06  | 0.32  | -0.10 | 0.06  | 0.27  | 0.06  | -0.69 |
| uwind.10m   | 0.03  | 0.32  | 0.45  | -0.05 | -0.63 | 0.04  | 0.09  | -0.38 | 0.37  | -0.04 | 0.02  |
| VIS         | -0.42 | 0.24  | -0.02 | 0.17  | 0.11  | 0.08  | 0.12  | 0.54  | 0.59  | 0.26  | 0.02  |
| vwind.10m   | 0.17  | 0.32  | 0.08  | 0.72  | 0.19  | 0.47  | 0.03  | -0.18 | -0.20 | 0.11  | 0.00  |
| Explained % | 31.98 | 16.97 | 16.18 | 8.65  | 7.80  | 5.99  | 4.97  | 3.38  | 2.90  | 0.98  | 0.20  |

**Table S5.** The total variance explained by each principal component: Sycamore.

| Sycamore  | PC1   | PC2   | PC3   | PC4   | PC5   | PC6   | PC7   | PC8   | PC9   | PC10  | PC11  |
|-----------|-------|-------|-------|-------|-------|-------|-------|-------|-------|-------|-------|
| WS        | 0.04  | -0.03 | 0.50  | -0.19 | 0.70  | -0.12 | 0.23  | -0.32 | 0.23  | 0.05  | 0.00  |
| RH        | 0.40  | -0.12 | -0.18 | 0.19  | -0.15 | -0.40 | 0.56  | 0.00  | 0.02  | 0.51  | 0.00  |
| BP        | -0.31 | -0.22 | -0.18 | -0.25 | -0.07 | 0.57  | 0.63  | -0.15 | -0.10 | -0.05 | 0.01  |
| SR        | -0.28 | 0.43  | -0.30 | -0.30 | 0.08  | -0.04 | -0.22 | -0.38 | -0.17 | 0.57  | 0.01  |
| OT        | 0.03  | 0.50  | -0.45 | 0.04  | 0.14  | -0.28 | 0.29  | -0.15 | 0.13  | -0.57 | 0.00  |
| APCP      | 0.47  | 0.06  | -0.17 | -0.25 | 0.07  | 0.30  | -0.11 | 0.08  | 0.23  | 0.04  | 0.72  |
| HPBL      | 0.13  | 0.48  | 0.35  | -0.31 | -0.02 | 0.01  | 0.24  | 0.48  | -0.49 | 0.00  | -0.02 |
| PRATE     | 0.46  | 0.07  | -0.18 | -0.26 | 0.06  | 0.32  | -0.10 | 0.06  | 0.27  | 0.06  | -0.69 |
| uwind.10m | 0.03  | 0.32  | 0.45  | -0.05 | -0.63 | 0.04  | 0.09  | -0.38 | 0.37  | -0.04 | 0.02  |
| VIS       | -0.42 | 0.24  | -0.02 | 0.17  | 0.11  | 0.08  | 0.12  | 0.54  | 0.59  | 0.26  | 0.02  |

|             |       |       |       |      |      |      |      |       |       |      |      |
|-------------|-------|-------|-------|------|------|------|------|-------|-------|------|------|
| vwind.10m   | 0.17  | 0.32  | 0.08  | 0.72 | 0.19 | 0.47 | 0.03 | -0.18 | -0.20 | 0.11 | 0.00 |
| Explained % | 31.98 | 16.97 | 16.18 | 8.65 | 7.80 | 5.99 | 4.97 | 3.38  | 2.90  | 0.98 | 0.20 |

**Table S6.** The total variance explained by each principal component: Yankee.

| Yankee      | PC1   | PC2   | PC3   | PC4   | PC5   | PC6   | PC7   | PC8   | PC9   | PC10  | PC11  |
|-------------|-------|-------|-------|-------|-------|-------|-------|-------|-------|-------|-------|
| WS          | 0.04  | -0.03 | 0.50  | -0.19 | 0.70  | -0.12 | 0.23  | -0.32 | 0.23  | 0.05  | 0.00  |
| RH          | 0.40  | -0.12 | -0.18 | 0.19  | -0.15 | -0.40 | 0.56  | 0.00  | 0.02  | 0.51  | 0.00  |
| BP          | -0.31 | -0.22 | -0.18 | -0.25 | -0.07 | 0.57  | 0.63  | -0.15 | -0.10 | -0.05 | 0.01  |
| SR          | -0.28 | 0.43  | -0.30 | -0.30 | 0.08  | -0.04 | -0.22 | -0.38 | -0.17 | 0.57  | 0.01  |
| OT          | 0.03  | 0.50  | -0.45 | 0.04  | 0.14  | -0.28 | 0.29  | -0.15 | 0.13  | -0.57 | 0.00  |
| APCP        | 0.47  | 0.06  | -0.17 | -0.25 | 0.07  | 0.30  | -0.11 | 0.08  | 0.23  | 0.04  | 0.72  |
| HPBL        | 0.13  | 0.48  | 0.35  | -0.31 | -0.02 | 0.01  | 0.24  | 0.48  | -0.49 | 0.00  | -0.02 |
| PRATE       | 0.46  | 0.07  | -0.18 | -0.26 | 0.06  | 0.32  | -0.10 | 0.06  | 0.27  | 0.06  | -0.69 |
| uwind.10m   | 0.03  | 0.32  | 0.45  | -0.05 | -0.63 | 0.04  | 0.09  | -0.38 | 0.37  | -0.04 | 0.02  |
| VIS         | -0.42 | 0.24  | -0.02 | 0.17  | 0.11  | 0.08  | 0.12  | 0.54  | 0.59  | 0.26  | 0.02  |
| vwind.10m   | 0.17  | 0.32  | 0.08  | 0.72  | 0.19  | 0.47  | 0.03  | -0.18 | -0.20 | 0.11  | 0.00  |
| Explained % | 31.98 | 16.97 | 16.18 | 8.65  | 7.80  | 5.99  | 4.97  | 3.38  | 2.90  | 0.98  | 0.20  |

**Table S7.** MLR study on data obtained at Amanda.

| MLR runs | No of variables (p) | Predictor variables | r    | rsquare |
|----------|---------------------|---------------------|------|---------|
| 1        | 4                   | HPBL,OT, VIS        | 0.46 | 0.22    |
| 2        | 2                   | HPBL, OT            | 0.45 | 0.21    |
| 3        | 5                   | BP,HPBL,OT,VIS      | 0.46 | 0.22    |

**Table S8.** MLR study on data obtained at Batavia.

| MLR runs | No of variables (p) | Predictor variables | r    | rsquare |
|----------|---------------------|---------------------|------|---------|
| 1        | 4                   | HPBL, OT, VIS       | 0.29 | 0.087   |
| 2        | 2                   | HPBL, OT            | 0.28 | 0.08    |
| 3        | 5                   | BP,HPBL,OT,VIS      | 0.33 | 0.11    |

**Table S9.** MLR study on data obtained at Colerain.

| MLR runs | No of variables (p) | Predictor variables | r    | rsquare |
|----------|---------------------|---------------------|------|---------|
| 1        | 4                   | HPBL, OT, VIS       | 0.37 | 0.14    |
| 2        | 2                   | HPBL, OT            | 0.36 | 0.13    |
| 3        | 5                   | BP,HPBL,OT,VIS      | 0.38 | 0.15    |

**Table S10.** MLR study on data obtained at Lebanon.

| MLR runs | No of variables (p) | Predictor variables | r | rsquare |
|----------|---------------------|---------------------|---|---------|
|----------|---------------------|---------------------|---|---------|

|   |   |                |      |      |
|---|---|----------------|------|------|
| 1 | 4 | HPBL, OT, VIS  | 0.28 | 0.08 |
| 2 | 2 | HPBL, OT       | 0.28 | 0.08 |
| 3 | 5 | BP,HPBL,OT,VIS | 0.28 | 0.08 |

**Table S11.** MLR study on data obtained at Sycamore.

| MLR runs | No of variables (p) | Predictor variables | r    | rsquare |
|----------|---------------------|---------------------|------|---------|
| 1        | 4                   | HPBL, OT, VIS       | 0.38 | 0.15    |
| 2        | 2                   | HPBL, OT            | 0.38 | 0.15    |
| 3        | 5                   | BP,HPBL,OT,VIS      | 0.4  | 0.16    |

**Table S12.** MLR study on data obtained at Yankee.

| MLR runs | No of variables (p) | Predictor variables | r    | rsquare |
|----------|---------------------|---------------------|------|---------|
| 1        | 4                   | HPBL, OT, VIS       | 0.45 | 0.21    |
| 2        | 2                   | HPBL, OT            | 0.43 | 0.19    |
| 3        | 5                   | BP,HPBL,OT,VIS      | 0.48 | 0.24    |

**Table S13.** Lognormal parameters for seasons and clusters at Amanda.

| Amanda        | mu   | sigma |
|---------------|------|-------|
| Amanda_Winter | 2.20 | 0.48  |
| Amanda_Spring | 2.29 | 0.46  |
| Amanda_Summer | 2.33 | 0.44  |
| Amanda_Fall   | 2.12 | 0.55  |
| Amanda_Clus1  | 2.15 | 0.44  |
| Amanda_Clus2  | 2.31 | 0.49  |
| Amanda_Clus3  | 2.19 | 0.49  |
| Amanda_Clus4  | 2.04 | 0.51  |

**Table S14.** Lognormal parameters for seasons and clusters at Bataviaa.

| Batavia        | mu   | sigma |
|----------------|------|-------|
| Batavia_Winter | 2.23 | 0.43  |
| Batavia_Spring | 2.30 | 0.37  |
| Batavia_Summer | 2.52 | 0.40  |
| Batavia_Fall   | 2.16 | 0.46  |
| Batavia_Clus1  | 2.34 | 0.43  |
| Batavia_Clus2  | 2.34 | 0.44  |
| Batavia_Clus3  | 2.18 | 0.51  |
| Batavia_Clus4  | 2.20 | 0.43  |

**Table S15.** Lognormal parameters for seasons and clusters at Colerain.

| Colerain        | mu   | sigma |
|-----------------|------|-------|
| Colerain_Winter | 2.54 | 0.42  |
| Colerain_Spring | 2.57 | 0.37  |
| Colerain_Summer | 2.53 | 0.42  |
| Colerain_Fall   | 2.30 | 0.48  |
| Colerain_Clus1  | 2.45 | 0.42  |
| Colerain_Clus2  | 2.54 | 0.41  |
| Colerain_Clus3  | 2.42 | 0.54  |
| Colerain_Clus4  | 2.32 | 0.47  |

**Table S16.** Lognormal parameters for seasons and clusters at Lebanon.

| <b>Lebanon</b> | <b>mu</b> | <b>sigma</b> |
|----------------|-----------|--------------|
| Lebanon_Winter | 2.49      | 0.45         |
| Lebanon_Spring | 2.57      | 0.36         |
| Lebanon_Summer | 2.53      | 0.42         |
| Lebanon_Fall   | 2.28      | 0.46         |
| Lebanon_Clus1  | 2.45      | 0.43         |
| Lebanon_Clus2  | 2.48      | 0.42         |
| Lebanon_Clus3  | 2.49      | 0.48         |
| Lebanon_Clus4  | 2.36      | 0.50         |

**Table S17.** Lognormal parameters for seasons and clusters at Sycamore.

| <b>Sycamore</b> | <b>mu</b> | <b>sigma</b> |
|-----------------|-----------|--------------|
| Sycamore_Winter | 2.31      | 0.43         |
| Sycamore_Spring | 2.36      | 0.44         |
| Sycamore_Summer | 2.45      | 0.44         |
| Sycamore_Fall   | 2.17      | 0.57         |
| Sycamore_Clus1  | 2.33      | 0.43         |
| Sycamore_Clus2  | 2.37      | 0.48         |
| Sycamore_Clus3  | 2.28      | 0.50         |
| Sycamore_Clus4  | 2.11      | 0.54         |

**Table S18.** Lognormal parameters for seasons and clusters at Yankee.

| <b>Yankee</b> | <b>mu</b> | <b>sigma</b> |
|---------------|-----------|--------------|
| Yankee_Winter | 2.40      | 0.41         |
| Yankee_Spring | 2.51      | 0.41         |
| Yankee_Summer | 2.66      | 0.40         |
| Yankee_Fall   | 2.36      | 0.50         |
| Yankee_Clus1  | 2.43      | 0.41         |
| Yankee_Clus2  | 2.55      | 0.45         |
| Yankee_Clus3  | 2.35      | 0.44         |
| Yankee_Clus4  | 2.31      | 0.44         |

**Table S19.** Lognormal parameters for seasons and clusters at Taft.

| <b>Taft</b> | <b>mu</b> | <b>sigma</b> |
|-------------|-----------|--------------|
| Taft_Winter | 2.37      | 0.44         |
| Taft_Spring | 2.40      | 0.40         |
| Taft_Summer | 2.50      | 0.46         |
| Taft_Fall   | 2.19      | 0.53         |
| Taft_Clus1  | 2.34      | 0.46         |
| Taft_Clus2  | 2.43      | 0.46         |
| Taft_Clus3  | 2.26      | 0.57         |
| Taft_Clus4  | 2.18      | 0.46         |

**Table S20.** Gamma parameters for seasons and clusters at Taft.

| <b>Taft</b> | <b>a</b> | <b>b</b> |
|-------------|----------|----------|
| Taft_Winter | 5.53     | 2.13     |



|             |      |      |
|-------------|------|------|
| Taft_Spring | 6.44 | 1.85 |
| Taft_Summer | 5.62 | 2.38 |
| Taft_Fall   | 3.95 | 2.58 |
| Taft_Clus1  | 5.40 | 2.11 |
| Taft_Clus2  | 5.32 | 2.36 |
| Taft_Clus3  | 3.66 | 3.03 |
| Taft_Clus4  | 5.02 | 1.95 |

**Table S21.** Gamma parameters for seasons and clusters at Amanda.

| <b>Amanda</b> | <b>a</b> | <b>b</b> |
|---------------|----------|----------|
| Amanda_Winter | 4.76     | 2.11     |
| Amanda_Spring | 5.29     | 2.05     |
| Amanda_Summer | 5.74     | 1.95     |
| Amanda_Fall   | 3.74     | 2.56     |
| Amanda_Clus1  | 5.62     | 1.67     |
| Amanda_Clus2  | 4.72     | 2.40     |
| Amanda_Clus3  | 4.84     | 2.05     |
| Amanda_Clus4  | 4.37     | 1.98     |

**Table S22.** Gamma parameters for seasons and clusters at Batavia.

| <b>Batavia</b> | <b>a</b> | <b>b</b> |
|----------------|----------|----------|
| Batavia_Winter | 5.42     | 1.91     |
| Batavia_Spring | 7.36     | 1.46     |
| Batavia_Summer | 6.81     | 1.98     |
| Batavia_Fall   | 4.85     | 2.01     |
| Batavia_Clus1  | 5.71     | 1.99     |
| Batavia_Clus2  | 5.49     | 2.08     |
| Batavia_Clus3  | 4.20     | 2.37     |
| Batavia_Clus4  | 5.87     | 1.67     |

**Table S23.** Gamma parameters for seasons and clusters at Colerain.

| <b>Colerain</b> | <b>a</b> | <b>b</b> |
|-----------------|----------|----------|
| Colerain_Winter | 6.08     | 2.28     |
| Colerain_Spring | 7.65     | 1.82     |
| Colerain_Summer | 6.04     | 2.26     |
| Colerain_Fall   | 4.76     | 2.33     |
| Colerain_Clus1  | 6.17     | 2.05     |
| Colerain_Clus2  | 6.33     | 2.17     |
| Colerain_Clus3  | 3.98     | 3.23     |
| Colerain_Clus4  | 4.78     | 2.38     |

**Table S24.** Gamma parameters for seasons and clusters at Lebanon.

| <b>Lebanon</b> | <b>a</b> | <b>b</b> |
|----------------|----------|----------|
| Lebanon_Winter | 5.44     | 2.42     |
| Lebanon_Spring | 8.10     | 1.73     |
| Lebanon_Summer | 6.54     | 2.07     |
| Lebanon_Fall   | 5.10     | 2.12     |
| Lebanon_Clus1  | 6.03     | 2.10     |
| Lebanon_Clus2  | 6.06     | 2.15     |
| Lebanon_Clus3  | 5.09     | 2.61     |
| Lebanon_Clus3  | 4.56     | 2.61     |

**Table S25.** Gamma parameters for seasons and clusters at Sycamore.

| Sycamore        | a    | b    |
|-----------------|------|------|
| Sycamore_Winter | 5.80 | 1.90 |
| Sycamore_Spring | 5.59 | 2.08 |
| Sycamore_Summer | 5.55 | 2.29 |
| Sycamore_Fall   | 3.51 | 2.89 |
| Sycamore_Clus1  | 5.80 | 1.93 |
| Sycamore_Clus2  | 4.78 | 2.50 |
| Sycamore_Clus3  | 4.56 | 2.40 |
| Sycamore_Clus4  | 4.06 | 2.31 |

**Table S26.** Gamma parameters for seasons and clusters at Yankee.

| Yankee        | a    | b    |
|---------------|------|------|
| Yankee_Winter | 6.18 | 1.94 |
| Yankee_Spring | 6.31 | 2.12 |
| Yankee_Summer | 6.83 | 2.25 |
| Yankee_Fall   | 4.37 | 2.72 |
| Yankee_Clus1  | 6.40 | 1.93 |
| Yankee_Clus2  | 5.36 | 2.65 |
| Yankee_Clus3  | 5.92 | 1.94 |
| Yankee_Clus4  | 5.53 | 2.00 |

**Table S27.** Regression equations for linear correlation between the monitoring sites in the form  $y = mx + c$ , where m is the slope and c are the y intercepts.

| Sites    | Taft | Amanda             | Batavia            | Colerain           | Lebanon            | Sycamore           | Yankee             |
|----------|------|--------------------|--------------------|--------------------|--------------------|--------------------|--------------------|
| Taft     |      | $y = 0.78x + 1.14$ | $y = 0.68x + 3.02$ | $y = 0.94x + 2.01$ | $y = 0.89x + 2.32$ | $y = 0.89x + 0.76$ | $y = 0.89x + 2.50$ |
| Amanda   |      |                    | $y = 0.62x + 4.49$ | $y = 0.95x + 3.21$ | $y = 0.87x + 3.69$ | $y = 0.95x + 1.37$ | $y = 1.04x + 2.21$ |
| Batavia  |      |                    |                    | $y = 0.74x + 4.89$ | $y = 0.74x + 4.62$ | $y = 0.73x + 3.2$  | $y = 0.74x + 4.86$ |
| Colerain |      |                    |                    |                    | $y = 0.82x + 2.00$ | $y = 0.79x + 0.98$ | $y = 0.81x + 2.42$ |
| Lebanon  |      |                    |                    |                    |                    | $y = 0.82x + 0.79$ | $y = 0.80x + 2.73$ |
| Sycamore |      |                    |                    |                    |                    |                    | $y = 0.91x + 2.71$ |
